# Supplementary material for: Identification and Characterization of Phytocyanin Family Genes in Cotton Genomes
Source: MDPI journal article supplement (doi:10.3390/genes14030611), 2023-02-28
Supplement: s1 [file s1]

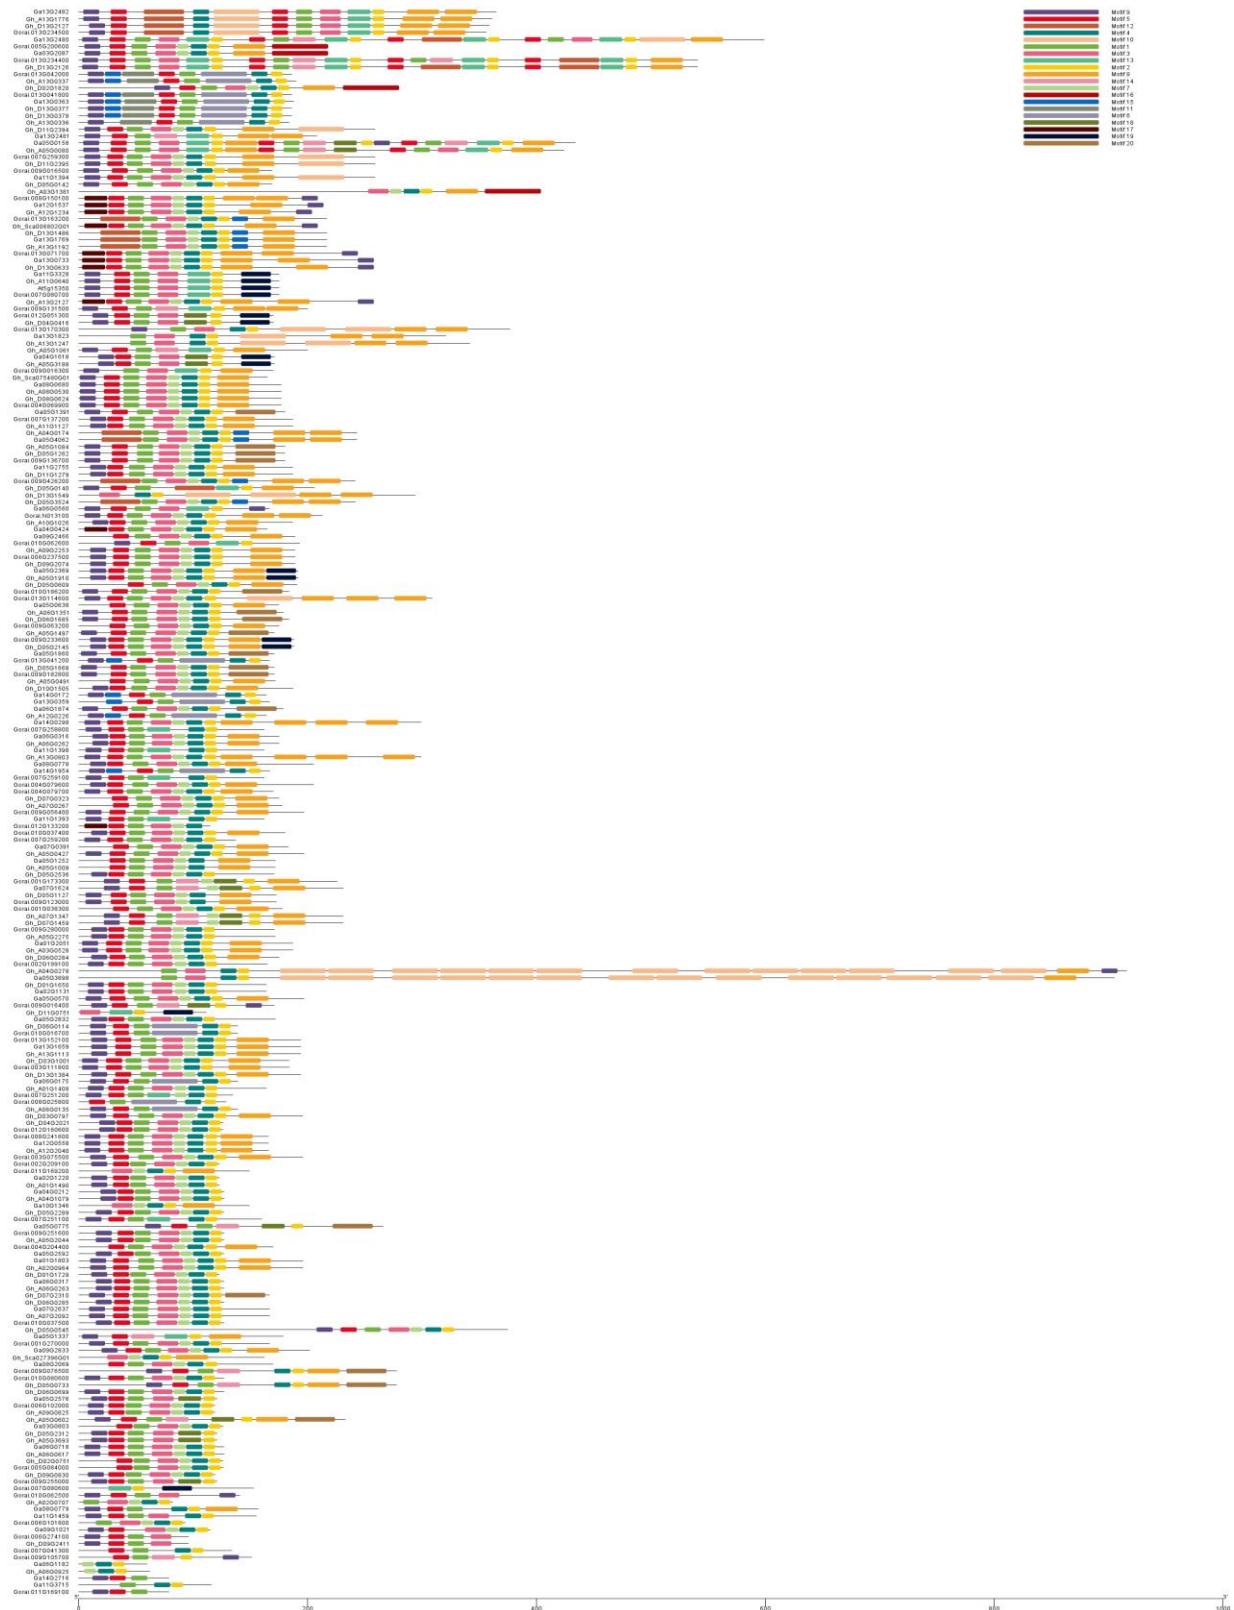

Figure S2: The conserved protein motifs of the amino acid sequences of PCs were analyzed by the MEME.
