# Supplementary material for: Identification and Characterization of Phytocyanin Family Genes in Cotton Genomes
Source: Genes (Basel). 2023 Feb 28;14(3):611. doi: 10.3390/genes14030611 (PMC10048054; doi:10.3390/genes14030611)
Supplement: Supplementary file 1 [file genes-14-00611-s001.zip]

Archive with 8 entries (8 files):
- Figure S1.pdf
- Figure S2.pdf
- Figure S3.pdf
- supplementary table S1.xlsx
- Supplementary Table S2.xlsx
- Supplementary Table S3.xlsx
- Supplementary Table S4.xlsx
- supplementary table S5.xlsx
