# Supplementary material for: Identification and Characterization of Phytocyanin Family Genes in Cotton Genomes
Source: Genes (Basel). 2023 Feb 28;14(3):611. doi: 10.3390/genes14030611 (PMC10048054; doi:10.3390/genes14030611)
Supplement: Supplementary file 1 [file genes-14-00611-s001.zip › supplementary table S1.xlsx]

## Sheet: Sheet1
	Gene ID	Principle Transcript ID	Species	Assembly	Chromosome	Start	End	Strand	Length (bp)
	Gh_A01G1408	Gh_A01G1408.1	Gossypium hirsutum	NAU	A01	88205501	88207043	-	1543
	Gh_A01G1490	Gh_A01G1490.1	Gossypium hirsutum	NAU	A01	90409540	90410041	+	502
	Gh_A02G0707	Gh_A02G0707.1	Gossypium hirsutum	NAU	A02	11987143	11987490	+	348
	Gh_A02G0964	Gh_A02G0964.1	Gossypium hirsutum	NAU	A02	40746617	40747285	-	669
	Gh_A03G0528	Gh_A03G0528.1	Gossypium hirsutum	NAU	A03	12730496	12731162	+	667
	Gh_A03G1381	Gh_A03G1381.1	Gossypium hirsutum	NAU	A03	92919635	92929269	+	9635
	Gh_A04G0174	Gh_A04G0174.1	Gossypium hirsutum	NAU	A04	3329423	3330576	-	1154
	Gh_A04G0278	Gh_A04G0278.1	Gossypium hirsutum	NAU	A04	6255338	6258615	-	3278
	Gh_A04G1079	Gh_A04G1079.1	Gossypium hirsutum	NAU	A04	60869127	60870759	+	1633
	Gh_A05G0080	Gh_A05G0080.1	Gossypium hirsutum	NAU	A05	958889	966689	-	7801
	Gh_A05G0427	Gh_A05G0427.1	Gossypium hirsutum	NAU	A05	4784240	4785126	+	887
	Gh_A05G0491	Gh_A05G0491.1	Gossypium hirsutum	NAU	A05	5326149	5326787	+	639
	Gh_A05G0602	Gh_A05G0602.1	Gossypium hirsutum	NAU	A05	6401576	6403178	-	1603
	Gh_A05G1009	Gh_A05G1009.1	Gossypium hirsutum	NAU	A05	10112126	10112854	+	729
	Gh_A05G1061	Gh_A05G1061.1	Gossypium hirsutum	NAU	A05	10710663	10711396	+	734
	Gh_A05G1084	Gh_A05G1084.1	Gossypium hirsutum	NAU	A05	10989262	10989923	-	662
	Gh_A05G1497	Gh_A05G1497.1	Gossypium hirsutum	NAU	A05	15331286	15332273	+	988
	Gh_A05G1910	Gh_A05G1910.1	Gossypium hirsutum	NAU	A05	20040943	20041608	+	666
	Gh_A05G2044	Gh_A05G2044.1	Gossypium hirsutum	NAU	A05	22320704	22321173	-	470
	Gh_A05G2275	Gh_A05G2275.1	Gossypium hirsutum	NAU	A05	26753510	26754511	+	1002
	Gh_A05G3188	Gh_A05G3188.1	Gossypium hirsutum	NAU	A05	83610288	83612115	-	1828
	Gh_A05G3693	Gh_A05G3693.1	Gossypium hirsutum	NAU	scaffold1204_A05	47968	48333	+	366
	Gh_A06G0135	Gh_A06G0135.1	Gossypium hirsutum	NAU	A06	1358794	1359373	+	580
	Gh_A06G0262	Gh_A06G0262.1	Gossypium hirsutum	NAU	A06	3253079	3254213	+	1135
	Gh_A06G0263	Gh_A06G0263.1	Gossypium hirsutum	NAU	A06	3256190	3256791	+	602
	Gh_A06G0617	Gh_A06G0617.1	Gossypium hirsutum	NAU	A06	15831186	15831652	+	467
	Gh_A06G0925	Gh_A06G0925.1	Gossypium hirsutum	NAU	A06	37351222	37351655	+	434
	Gh_A06G1351	Gh_A06G1351.1	Gossypium hirsutum	NAU	A06	95003842	95004633	+	792
	Gh_A07G0267	Gh_A07G0267.1	Gossypium hirsutum	NAU	A07	3343458	3344072	+	615
	Gh_A07G1347	Gh_A07G1347.1	Gossypium hirsutum	NAU	A07	33611199	33611994	-	796
	Gh_A07G2092	Gh_A07G2092.1	Gossypium hirsutum	NAU	A07	77485674	77486276	+	603
	Gh_A08G0530	Gh_A08G0530.1	Gossypium hirsutum	NAU	A08	8064006	8064618	-	613
	Gh_A09G0825	Gh_A09G0825.1	Gossypium hirsutum	NAU	A09	55166225	55166584	-	360
	Gh_A09G2253	Gh_A09G2253.1	Gossypium hirsutum	NAU	scaffold2279_A09	90457	92177	-	1721
	Gh_A10G1026	Gh_A10G1026.1	Gossypium hirsutum	NAU	A10	36789218	36848548	-	59331
	Gh_A11G0640	Gh_A11G0640.1	Gossypium hirsutum	NAU	A11	6271391	6272640	-	1250
	Gh_A11G1127	Gh_A11G1127.1	Gossypium hirsutum	NAU	A11	13227419	13228099	-	681
	Gh_A12G0226	Gh_A12G0226.1	Gossypium hirsutum	NAU	A12	3475697	3476272	-	576
	Gh_A12G1234	Gh_A12G1234.1	Gossypium hirsutum	NAU	A12	66742273	66742999	+	727
	Gh_A12G2040	Gh_A12G2040.1	Gossypium hirsutum	NAU	A12	83322021	83322620	+	600
	Gh_A13G0336	Gh_A13G0336.1	Gossypium hirsutum	NAU	A13	4331558	4332215	+	658
	Gh_A13G0337	Gh_A13G0337.1	Gossypium hirsutum	NAU	A13	4334815	4335490	+	676
	Gh_A13G0803	Gh_A13G0803.1	Gossypium hirsutum	NAU	A13	37572114	37573124	+	1011
	Gh_A13G1113	Gh_A13G1113.1	Gossypium hirsutum	NAU	A13	62056873	62057521	-	649
	Gh_A13G1192	Gh_A13G1192.1	Gossypium hirsutum	NAU	A13	64886531	64887294	-	764
	Gh_A13G1247	Gh_A13G1247.1	Gossypium hirsutum	NAU	A13	66350836	66352532	-	1697
	Gh_A13G1776	Gh_A13G1776.1	Gossypium hirsutum	NAU	A13	76700552	76702104	+	1553
	Gh_A13G2127	Gh_A13G2127.1	Gossypium hirsutum	NAU	scaffold3430_A13	19468	20334	-	867
	Gh_D01G1650	Gh_D01G1650.1	Gossypium hirsutum	NAU	D01	52129266	52130822	-	1557
	Gh_D01G1729	Gh_D01G1729.1	Gossypium hirsutum	NAU	D01	54004575	54005076	+	502
	Gh_D02G0751	Gh_D02G0751.1	Gossypium hirsutum	NAU	D02	11249848	11250328	+	481
	Gh_D02G1820	Gh_D02G1820.1	Gossypium hirsutum	NAU	D02	61127665	61135608	+	7944
	Gh_D03G0797	Gh_D03G0797.1	Gossypium hirsutum	NAU	D03	27378507	27379175	-	669
	Gh_D03G1001	Gh_D03G1001.1	Gossypium hirsutum	NAU	D03	34253403	34254061	-	659
	Gh_D04G0416	Gh_D04G0416.1	Gossypium hirsutum	NAU	D04	6520233	6522157	+	1925
	Gh_D04G2021	Gh_D04G2021.1	Gossypium hirsutum	NAU	scaffold3986_D04	4295	6251	+	1957
	Gh_D05G0140	Gh_D05G0140.1	Gossypium hirsutum	NAU	D05	1439927	1440547	-	621
	Gh_D05G0142	Gh_D05G0142.1	Gossypium hirsutum	NAU	D05	1447879	1448480	-	602
	Gh_D05G0545	Gh_D05G0545.1	Gossypium hirsutum	NAU	D05	4425708	4430427	+	4720
	Gh_D05G0609	Gh_D05G0609.1	Gossypium hirsutum	NAU	D05	4931031	4931936	+	906
	Gh_D05G0733	Gh_D05G0733.1	Gossypium hirsutum	NAU	D05	6025699	6027600	-	1902
	Gh_D05G1127	Gh_D05G1127.1	Gossypium hirsutum	NAU	D05	9661127	9661858	+	732
	Gh_D05G1262	Gh_D05G1262.1	Gossypium hirsutum	NAU	D05	10849639	10850300	-	662
	Gh_D05G1668	Gh_D05G1668.1	Gossypium hirsutum	NAU	D05	14966116	14967105	+	990
	Gh_D05G2145	Gh_D05G2145.1	Gossypium hirsutum	NAU	D05	20066711	20067357	+	647
	Gh_D05G2289	Gh_D05G2289.1	Gossypium hirsutum	NAU	D05	22177386	22177855	-	470
	Gh_D05G2312	Gh_D05G2312.1	Gossypium hirsutum	NAU	D05	22707908	22708273	+	366
	Gh_D05G2536	Gh_D05G2536.1	Gossypium hirsutum	NAU	D05	25645884	25646912	+	1029
	Gh_D05G3524	Gh_D05G3524.1	Gossypium hirsutum	NAU	D05	58162518	58163780	+	1263
	Gh_D06G0114	Gh_D06G0114.1	Gossypium hirsutum	NAU	D06	1185086	1185665	+	580
	Gh_D06G0284	Gh_D06G0284.1	Gossypium hirsutum	NAU	D06	3228878	3230025	+	1148
	Gh_D06G0285	Gh_D06G0285.1	Gossypium hirsutum	NAU	D06	3234357	3234959	+	603
	Gh_D06G0699	Gh_D06G0699.1	Gossypium hirsutum	NAU	D06	12096688	12097142	+	455
	Gh_D06G1685	Gh_D06G1685.1	Gossypium hirsutum	NAU	D06	55684181	55684967	+	787
	Gh_D07G0323	Gh_D07G0323.1	Gossypium hirsutum	NAU	D07	3459129	3459734	+	606
	Gh_D07G1459	Gh_D07G1459.1	Gossypium hirsutum	NAU	D07	24934008	24934803	-	796
	Gh_D07G2310	Gh_D07G2310.1	Gossypium hirsutum	NAU	D07	54411015	54411615	+	601
	Gh_D08G0624	Gh_D08G0624.1	Gossypium hirsutum	NAU	D08	7618825	7619437	-	613
	Gh_D09G0830	Gh_D09G0830.1	Gossypium hirsutum	NAU	D09	32873123	32873482	-	360
	Gh_D09G2074	Gh_D09G2074.1	Gossypium hirsutum	NAU	D09	48059337	48061061	+	1725
	Gh_D09G2411	Gh_D09G2411.1	Gossypium hirsutum	NAU	D09	50957046	50958039	-	994
	Gh_D10G1505	Gh_D10G1505.1	Gossypium hirsutum	NAU	D10	36338829	36373508	+	34680
	Gh_D11G0751	Gh_D11G0751.1	Gossypium hirsutum	NAU	D11	6494078	6494413	+	336
	Gh_D11G0752	Gh_D11G0752.1	Gossypium hirsutum	NAU	D11	6496789	6498038	-	1250
	Gh_D11G1279	Gh_D11G1279.1	Gossypium hirsutum	NAU	D11	12173403	12174083	-	681
	Gh_D11G2394	Gh_D11G2394.1	Gossypium hirsutum	NAU	D11	47409115	47410433	+	1319
	Gh_D11G2395	Gh_D11G2395.1	Gossypium hirsutum	NAU	D11	47479686	47481002	+	1317
	Gh_D13G0377	Gh_D13G0377.1	Gossypium hirsutum	NAU	D13	4049882	4060563	+	10682
	Gh_D13G0378	Gh_D13G0378.1	Gossypium hirsutum	NAU	D13	4062860	4063527	+	668
	Gh_D13G0633	Gh_D13G0633.1	Gossypium hirsutum	NAU	D13	8912796	8913661	+	866
	Gh_D13G1384	Gh_D13G1384.1	Gossypium hirsutum	NAU	D13	43490192	43490844	-	653
	Gh_D13G1486	Gh_D13G1486.1	Gossypium hirsutum	NAU	D13	46445062	46445825	-	764
	Gh_D13G1549	Gh_D13G1549.1	Gossypium hirsutum	NAU	D13	47678089	47679055	-	967
	Gh_D13G2126	Gh_D13G2126.1	Gossypium hirsutum	NAU	D13	56856970	56858964	+	1995
	Gh_D13G2127	Gh_D13G2127.1	Gossypium hirsutum	NAU	D13	56884360	56885901	+	1542
	Gh_Sca006802G01	Gh_Sca006802G01.1	Gossypium hirsutum	NAU	scaffold6802	6951	7716	-	766
	Gh_Sca027396G01	Gh_Sca027396G01.1	Gossypium hirsutum	NAU	scaffold27396	164	652	+	489
	Gh_Sca075480G01	Gh_Sca075480G01.1	Gossypium hirsutum	NAU	scaffold75480	7	580	+	574
