# Supplementary material for: Identification and Characterization of Phytocyanin Family Genes in Cotton Genomes
Source: Genes (Basel). 2023 Feb 28;14(3):611. doi: 10.3390/genes14030611 (PMC10048054; doi:10.3390/genes14030611)
Supplement: Supplementary file 1 [file genes-14-00611-s001.zip › Supplementary Table S2.xlsx]

## Sheet: Sheet1
	Table S2. In silico identification and analyses of PC gene family in G. hirsutum.
	Gene ID	Principle Transcript ID	Species	Assembly	Protein Length (aa)	Molecular Weight (kDa)	Charge	Isoelectric Point	Grand Average of Hydropathy
	Gh_A01G1408	Gh_A01G1408.1	Gossypium hirsutum	NAU	164	18.134	-5.5	4.616	-0.125
	Gh_A01G1490	Gh_A01G1490.1	Gossypium hirsutum	NAU	123	13.257	16.5	10.679	0.067
	Gh_A02G0707	Gh_A02G0707.1	Gossypium hirsutum	NAU	82	8.94	7	9.856	-0.144
	Gh_A02G0964	Gh_A02G0964.1	Gossypium hirsutum	NAU	196	21.218	0.5	6.739	0.039
	Gh_A03G0528	Gh_A03G0528.1	Gossypium hirsutum	NAU	187	19.968	-0.5	6.228	0.109
	Gh_A03G1381	Gh_A03G1381.1	Gossypium hirsutum	NAU	404	45.973	10	8.416	-0.43
	Gh_A04G0174	Gh_A04G0174.1	Gossypium hirsutum	NAU	243	26.249	-4	5.2	-0.262
	Gh_A04G0278	Gh_A04G0278.1	Gossypium hirsutum	NAU	916	97.133	19.5	6.997	-0.582
	Gh_A04G1079	Gh_A04G1079.1	Gossypium hirsutum	NAU	127	13.255	10.5	10.02	0.191
	Gh_A05G0080	Gh_A05G0080.1	Gossypium hirsutum	NAU	424	45.661	-9	5.119	-0.15
	Gh_A05G0427	Gh_A05G0427.1	Gossypium hirsutum	NAU	197	22.089	8.5	9.619	-0.272
	Gh_A05G0491	Gh_A05G0491.1	Gossypium hirsutum	NAU	172	18.763	5.5	9.398	-0.118
	Gh_A05G0602	Gh_A05G0602.1	Gossypium hirsutum	NAU	233	25.717	-15.5	4.067	-0.315
	Gh_A05G1009	Gh_A05G1009.1	Gossypium hirsutum	NAU	172	18.63	3.5	8.313	0.184
	Gh_A05G1061	Gh_A05G1061.1	Gossypium hirsutum	NAU	200	21.162	-5.5	4.339	0.247
	Gh_A05G1084	Gh_A05G1084.1	Gossypium hirsutum	NAU	180	19.923	0.5	6.618	0.053
	Gh_A05G1497	Gh_A05G1497.1	Gossypium hirsutum	NAU	171	18.196	-3.5	4.945	0.121
	Gh_A05G1910	Gh_A05G1910.1	Gossypium hirsutum	NAU	192	19.586	0.5	6.738	0.087
	Gh_A05G2044	Gh_A05G2044.1	Gossypium hirsutum	NAU	127	13.346	8	9.605	0.153
	Gh_A05G2275	Gh_A05G2275.1	Gossypium hirsutum	NAU	172	18.222	2.5	7.857	0.416
	Gh_A05G3188	Gh_A05G3188.1	Gossypium hirsutum	NAU	171	19.764	1	6.941	0.012
	Gh_A05G3693	Gh_A05G3693.1	Gossypium hirsutum	NAU	121	13.543	0	6.495	0.161
	Gh_A06G0135	Gh_A06G0135.1	Gossypium hirsutum	NAU	139	15.717	0.5	7.243	0.063
	Gh_A06G0262	Gh_A06G0262.1	Gossypium hirsutum	NAU	175	18.017	-2.5	4.992	0.211
	Gh_A06G0263	Gh_A06G0263.1	Gossypium hirsutum	NAU	127	13.698	-4	4.426	0.247
	Gh_A06G0617	Gh_A06G0617.1	Gossypium hirsutum	NAU	127	13.789	-2	5.518	-0.001
	Gh_A06G0925	Gh_A06G0925.1	Gossypium hirsutum	NAU	62	6.877	4.5	8.913	-0.135
	Gh_A06G1351	Gh_A06G1351.1	Gossypium hirsutum	NAU	179	19.466	-4.5	4.763	0.05
	Gh_A07G0267	Gh_A07G0267.1	Gossypium hirsutum	NAU	178	19.011	6	9.605	-0.023
	Gh_A07G1347	Gh_A07G1347.1	Gossypium hirsutum	NAU	231	24.864	-4.5	4.829	-0.213
	Gh_A07G2092	Gh_A07G2092.1	Gossypium hirsutum	NAU	167	18.024	2.5	7.95	0.23
	Gh_A08G0530	Gh_A08G0530.1	Gossypium hirsutum	NAU	177	17.78	-4	4.305	0.117
	Gh_A09G0825	Gh_A09G0825.1	Gossypium hirsutum	NAU	119	13.041	-2	5.102	-0.09
	Gh_A09G2253	Gh_A09G2253.1	Gossypium hirsutum	NAU	189	19.813	8	9.166	0.101
	Gh_A10G1026	Gh_A10G1026.1	Gossypium hirsutum	NAU	187	19.995	11	10.014	0.175
	Gh_A11G0640	Gh_A11G0640.1	Gossypium hirsutum	NAU	175	19.405	6	9.265	-0.063
	Gh_A11G1127	Gh_A11G1127.1	Gossypium hirsutum	NAU	187	19.735	6	8.632	0.16
	Gh_A12G0226	Gh_A12G0226.1	Gossypium hirsutum	NAU	164	18.605	17.5	10.497	-0.277
	Gh_A12G1234	Gh_A12G1234.1	Gossypium hirsutum	NAU	204	20.954	-8	4.181	0.036
	Gh_A12G2040	Gh_A12G2040.1	Gossypium hirsutum	NAU	166	17.721	1.5	7.383	0.4
	Gh_A13G0336	Gh_A13G0336.1	Gossypium hirsutum	NAU	184	21.078	8	9.286	-0.316
	Gh_A13G0337	Gh_A13G0337.1	Gossypium hirsutum	NAU	190	21.749	8	9.286	-0.359
	Gh_A13G0803	Gh_A13G0803.1	Gossypium hirsutum	NAU	299	31.515	2.5	8.035	-0.226
	Gh_A13G1113	Gh_A13G1113.1	Gossypium hirsutum	NAU	194	21.611	0.5	6.673	-0.114
	Gh_A13G1192	Gh_A13G1192.1	Gossypium hirsutum	NAU	217	23.245	-3.5	4.915	-0.288
	Gh_A13G1247	Gh_A13G1247.1	Gossypium hirsutum	NAU	342	35.5	11	8.823	-0.419
	Gh_A13G1776	Gh_A13G1776.1	Gossypium hirsutum	NAU	361	36.586	6	8.281	-0.063
	Gh_A13G2127	Gh_A13G2127.1	Gossypium hirsutum	NAU	258	26.885	-17	3.835	-0.16
	Gh_D01G1650	Gh_D01G1650.1	Gossypium hirsutum	NAU	164	18.141	-5	4.617	-0.103
	Gh_D01G1729	Gh_D01G1729.1	Gossypium hirsutum	NAU	123	13.098	14.5	10.446	0.124
	Gh_D02G0751	Gh_D02G0751.1	Gossypium hirsutum	NAU	126	13.736	8	9.748	0.036
	Gh_D02G1820	Gh_D02G1820.1	Gossypium hirsutum	NAU	280	31.268	-3.5	5.365	-0.156
	Gh_D03G0797	Gh_D03G0797.1	Gossypium hirsutum	NAU	196	21.18	3.5	8.19	0.027
	Gh_D03G1001	Gh_D03G1001.1	Gossypium hirsutum	NAU	184	19.68	-0.5	6.233	0.109
	Gh_D04G0416	Gh_D04G0416.1	Gossypium hirsutum	NAU	170	19.555	0.5	6.783	-0.02
	Gh_D04G2021	Gh_D04G2021.1	Gossypium hirsutum	NAU	126	13.281	11.5	10.164	0.104
	Gh_D05G0140	Gh_D05G0140.1	Gossypium hirsutum	NAU	206	22.054	0.5	6.62	0.25
	Gh_D05G0142	Gh_D05G0142.1	Gossypium hirsutum	NAU	169	17.973	-5.5	4.392	0.158
	Gh_D05G0545	Gh_D05G0545.1	Gossypium hirsutum	NAU	375	41.526	28	10.34	-0.429
	Gh_D05G0609	Gh_D05G0609.1	Gossypium hirsutum	NAU	191	20.605	11	9.92	-0.299
	Gh_D05G0733	Gh_D05G0733.1	Gossypium hirsutum	NAU	278	30.981	-9	4.683	-0.427
	Gh_D05G1127	Gh_D05G1127.1	Gossypium hirsutum	NAU	173	18.682	3.5	8.313	0.227
	Gh_D05G1262	Gh_D05G1262.1	Gossypium hirsutum	NAU	180	19.862	0.5	6.618	0.073
	Gh_D05G1668	Gh_D05G1668.1	Gossypium hirsutum	NAU	171	18.184	-4	4.938	0.128
	Gh_D05G2145	Gh_D05G2145.1	Gossypium hirsutum	NAU	188	19.292	0.5	6.746	0.158
	Gh_D05G2289	Gh_D05G2289.1	Gossypium hirsutum	NAU	127	13.319	8	9.605	0.174
	Gh_D05G2312	Gh_D05G2312.1	Gossypium hirsutum	NAU	121	13.543	0	6.495	0.161
	Gh_D05G2536	Gh_D05G2536.1	Gossypium hirsutum	NAU	171	17.992	-0.5	6.214	0.403
	Gh_D05G3524	Gh_D05G3524.1	Gossypium hirsutum	NAU	242	26.017	-3	5.545	-0.273
	Gh_D06G0114	Gh_D06G0114.1	Gossypium hirsutum	NAU	139	15.707	1	7.403	0.063
	Gh_D06G0284	Gh_D06G0284.1	Gossypium hirsutum	NAU	175	17.998	-2.5	4.992	0.257
	Gh_D06G0285	Gh_D06G0285.1	Gossypium hirsutum	NAU	127	13.719	-5.5	4.147	0.22
	Gh_D06G0699	Gh_D06G0699.1	Gossypium hirsutum	NAU	127	13.794	-3	5.022	0.022
	Gh_D06G1685	Gh_D06G1685.1	Gossypium hirsutum	NAU	184	20.136	-7	4.48	0.001
	Gh_D07G0323	Gh_D07G0323.1	Gossypium hirsutum	NAU	175	18.77	6	9.605	-0.037
	Gh_D07G1459	Gh_D07G1459.1	Gossypium hirsutum	NAU	231	24.898	-2.5	5.495	-0.172
	Gh_D07G2310	Gh_D07G2310.1	Gossypium hirsutum	NAU	167	17.953	1.5	7.383	0.244
	Gh_D08G0624	Gh_D08G0624.1	Gossypium hirsutum	NAU	177	17.782	-4	4.305	0.135
	Gh_D09G0830	Gh_D09G0830.1	Gossypium hirsutum	NAU	119	13.058	-3	4.818	-0.124
	Gh_D09G2074	Gh_D09G2074.1	Gossypium hirsutum	NAU	189	19.839	8	9.166	0.129
	Gh_D09G2411	Gh_D09G2411.1	Gossypium hirsutum	NAU	96	10.797	0	6.492	0.19
	Gh_D10G1505	Gh_D10G1505.1	Gossypium hirsutum	NAU	187	20.131	10.5	9.851	0.198
	Gh_D11G0751	Gh_D11G0751.1	Gossypium hirsutum	NAU	111	12.573	0	6.503	-0.248
	Gh_D11G0752	Gh_D11G0752.1	Gossypium hirsutum	NAU	175	19.359	6	9.299	-0.025
	Gh_D11G1279	Gh_D11G1279.1	Gossypium hirsutum	NAU	187	19.621	6	8.63	0.121
	Gh_D11G2394	Gh_D11G2394.1	Gossypium hirsutum	NAU	259	27.698	-2	5.004	-0.171
	Gh_D11G2395	Gh_D11G2395.1	Gossypium hirsutum	NAU	259	27.677	-2	5.004	-0.109
	Gh_D13G0377	Gh_D13G0377.1	Gossypium hirsutum	NAU	186	21.221	8	9.286	-0.329
	Gh_D13G0378	Gh_D13G0378.1	Gossypium hirsutum	NAU	186	21.196	6	8.759	-0.358
	Gh_D13G0633	Gh_D13G0633.1	Gossypium hirsutum	NAU	258	27.022	-15	3.894	-0.085
	Gh_D13G1384	Gh_D13G1384.1	Gossypium hirsutum	NAU	194	21.634	-0.5	6.344	-0.12
	Gh_D13G1486	Gh_D13G1486.1	Gossypium hirsutum	NAU	217	23.329	-5.5	4.637	-0.34
	Gh_D13G1549	Gh_D13G1549.1	Gossypium hirsutum	NAU	294	29.916	10.5	9.066	-0.461
	Gh_D13G2126	Gh_D13G2126.1	Gossypium hirsutum	NAU	541	57.467	-19.5	4.524	-0.276
	Gh_D13G2127	Gh_D13G2127.1	Gossypium hirsutum	NAU	359	36.259	2	7.068	-0.009
	Gh_Sca006802G01	Gh_Sca006802G01.1	Gossypium hirsutum	NAU	209	21.427	-8	4.181	0.037
	Gh_Sca027396G01	Gh_Sca027396G01.1	Gossypium hirsutum	NAU	162	17.345	2	7.124	0.172
	Gh_Sca075480G01	Gh_Sca075480G01.1	Gossypium hirsutum	NAU	165	16.654	-4	4.305	-0.048
