# Supplementary material for: Identification and Characterization of Phytocyanin Family Genes in Cotton Genomes
Source: Genes (Basel). 2023 Feb 28;14(3):611. doi: 10.3390/genes14030611 (PMC10048054; doi:10.3390/genes14030611)
Supplement: Supplementary file 1 [file genes-14-00611-s001.zip › Supplementary Table S3.xlsx]

## Sheet: Sheet1
GH vs GH										GR vs GA										GR vs GH
Seq_1	Seq_2	Ka	Ks	Ka_Ks	EffectiveLen	AverageS-sites	AverageN-sites			Seq_1	Seq_2	Ka	Ks	Ka_Ks	EffectiveLen	AverageS-sites	AverageN-sites			Seq_1	Seq_2	Ka	Ks	Ka_Ks	EffectiveLen	AverageS-sites	AverageN-sites
Gh_A01G1408.1	Gh_D01G1650.1	0.0158213	0.01862	0.849691	492	108.75	383.25			Ga01G1803.1	Gorai.003G075500.1	0.0158796	0.0213538	0.743645	588	142.5	445.5			Gorai.001G038300.1	Gh_A07G0267.1	0.0197542	0.0588537	0.33565	534	123.667	410.333
Gh_A01G1490.1	Gh_D01G1729.1	0.00710485	0.0235776	0.301339	369	86.1667	282.833			Ga01G2051.1	Gorai.003G111800.1	0.00476665	0.0311531	0.153007	552	131.083	420.917			Gorai.001G173300.1	Gh_D07G1459.1	0.00393057	0.0303993	0.129298	678	167.833	510.167
Gh_A02G0707.1	Gh_D02G0751.1	0.0107529	0	#NAME?	246	58.6667	187.333			Ga02G1131.1	Gorai.002G199100.1	0.0105219	0.0375665	0.280086	492	109.167	382.833			Gorai.001G270000.1	Gh_D07G2310.1	0.0159228	0.00836829	1.90275	501	120.167	380.833
Gh_A02G0964.1	Gh_D03G0797.1	0.0113188	0.0285239	0.396819	588	142.917	445.083			Ga02G1220.1	Gorai.002G209100.1	0.00354401	0.0235776	0.150313	369	86.1667	282.833			Gorai.002G199100.1	Gh_D01G1650.1	0.00788789	0	#NAME?	492	109.667	382.333
Gh_A03G0528.1	Gh_D03G1001.1	0.00476665	0.0232427	0.205082	552	131.083	420.917			Ga03G0803.1	Gorai.005G084000.1	0.0103868	0.047353	0.219348	378	87.1667	290.833			Gorai.002G209100.1	Gh_A01G1490.1	0.00354401	0.0235776	0.150313	369	86.1667	282.833
Gh_A03G1381.1	Gh_D02G1820.1	0.217449	0.3087	0.704403	828	197.583	630.417			Ga03G2087.1	Gorai.005G200600.1	0.0121174	0.0130296	0.929987	654	154.833	499.167			Gorai.003G075500.1	Gh_D03G0797.1	0.00676061	0.00706303	0.957183	588	142.25	445.75
Gh_A04G0174.1	Gh_D05G3524.1	0.0109641	0.0232464	0.471647	726	174.75	551.25			Ga04G0212.1	Gorai.012G160600.1	0.0177523	0.0442933	0.40079	378	93	285			Gorai.003G111800.1	Gh_D03G1001.1	0	0	NaN	552	131.333	420.667
Gh_A04G0278.1	Gh_A13G1247.1	0.348969	1.28476	0.271622	1014	256.333	757.667			Ga04G0424.1	Gorai.012G133200.1	0.0690949	0.140936	0.490256	345	83.6667	261.333			Gorai.004G069900.1	Gh_D08G0624.1	0	0	NaN	531	137.667	393.333
Gh_A04G1079.1	Gh_D04G2021.1	0.0213538	0.0557878	0.382768	378	93	285			Ga04G1618.1	Gorai.012G051300.1	0.0179803	0.0629111	0.285805	510	116	394			Gorai.004G079600.1	Gh_Sca027396G01.1	0.060032	0.11493	0.522334	486	122	364
Gh_A05G0080.1	Gh_D13G2126.1	0.364207	1.01353	0.359347	1218	297.75	920.25			Ga05G0158.1	Gorai.013G234400.1	0.369568	1.0323	0.358005	1248	304.417	943.583			Gorai.004G079700.1	Gh_A11G1127.1	0.554429	2.73543	0.202685	510	121.5	388.5
Gh_A05G0427.1	Gh_D05G0545.1	0.114359	0.162468	0.703885	513	114.667	398.333			Ga05G0570.1	Gorai.009G056400.1	0.0199053	0.0465868	0.427274	591	132.833	458.167			Gorai.004G204400.1	Gh_A12G2040.1	0.161608	0.424468	0.380729	498	120.833	377.167
Gh_A05G0491.1	Gh_D05G0609.1	0.0873616	0.119293	0.732329	516	123.917	392.083			Ga05G0638.1	Gorai.009G063200.1	0.00757901	0.0321334	0.235861	525	127.167	397.833			Gorai.005G084000.1	Gh_D02G0751.1	0	0.0595551	0	378	87.3333	290.667
Gh_A05G0602.1	Gh_D05G0733.1	0.0092823	0.059634	0.155654	699	157	542			Ga05G0775.1	Gorai.009G076500.1	0.0065147	0.0454685	0.143279	798	181.333	616.667			Gorai.005G200600.1	Gh_D02G1820.1	0.00401876	0	#NAME?	654	155	499
Gh_A05G1009.1	Gh_D05G1127.1	0.00775869	0.0403323	0.192369	516	127.333	388.667			Ga05G1252.1	Gorai.009G123000.1	0.00775869	0.0239382	0.324113	516	127.333	388.667			Gorai.006G101800.1	Gh_A09G0825.1	0.186015	0.82797	0.224665	279	62.5	216.5
Gh_A05G1061.1	Gh_A05G0080.1	0.53442	NaN	NaN	594	149	445			Ga05G1337.1	Gorai.009G131500.1	0.0252602	0.0701354	0.360164	537	134.417	402.583			Gorai.006G102000.1	Gh_D09G0830.1	0.0108632	0.0525379	0.206769	357	78.8333	278.167
Gh_A05G1084.1	Gh_D05G1262.1	0.00482317	0	#NAME?	540	124	416			Ga05G1391.1	Gorai.009G136700.1	0.00481736	0.0416196	0.115747	540	123.5	416.5			Gorai.006G237500.1	Gh_D09G2074.1	0.00235571	0.00708388	0.332546	567	141.833	425.167
Gh_A05G1497.1	Gh_D05G1668.1	0.0155715	0.0588537	0.26458	513	123.667	389.333			Ga05G1860.1	Gorai.009G182800.1	0.0129481	0.0416196	0.311106	513	123.5	389.5			Gorai.006G274100.1	Gh_D09G2411.1	0.00447095	0	#NAME?	288	63.6667	224.333
Gh_A05G1910.1	Gh_D05G2145.1	0.0144728	0.0571365	0.253302	564	145.417	418.583			Ga05G2369.1	Gorai.009G233600.1	0.00960974	0.0799304	0.120226	564	145.083	418.917			Gorai.007G041300.1	Gh_A13G1113.1	0.657001	NaN	NaN	399	86.1667	312.833
Gh_A05G2044.1	Gh_D05G2289.1	0.00346821	0.0109491	0.316758	381	92	289			Ga05G2576.1	Gorai.009G255000.1	0.0108436	0.0240985	0.449969	363	84.3333	278.667			Gorai.007G080600.1	Gh_D11G0751.1	0.036742	0.0389698	0.942834	330	79	251
Gh_A05G2275.1	Gh_D05G2536.1	0.0104327	0.0488308	0.21365	513	126.917	386.083			Ga05G2592.1	Gorai.009G251600.1	0.0210479	0.0109591	1.92058	381	91.9167	289.083			Gorai.007G080700.1	Gh_D11G0752.1	0	0.00793658	0	525	126.667	398.333
Gh_A05G3188.1	Gh_D04G0416.1	0.0206376	0.11029	0.187121	510	117	393			Ga05G2832.1	Gorai.009G280000.1	0.0130523	0.0574443	0.227217	513	126.583	386.417			Gorai.007G137200.1	Gh_A11G1127.1	0.00952205	0.0220199	0.432429	561	138.25	422.75
Gh_A05G3693.1	Gh_D05G2312.1	0	0.0242936	0	363	83.6667	279.333			Ga05G3898.1	Gorai.013G170300.1	0.395268	1.31968	0.299519	1092	272.583	819.417			Gorai.007G251100.1	Gh_A12G2040.1	0.485064	2.86866	0.169091	474	110.75	363.25
Gh_A06G0135.1	Gh_D06G0114.1	0.0125789	0.0318069	0.395478	417	96.3333	320.667			Ga05G4062.1	Gorai.009G426200.1	0.0109508	0.0292863	0.373921	726	174.083	551.917			Gorai.007G251200.1	Gh_A13G0803.1	0.438233	NaN	NaN	399	92.6667	306.333
Gh_A06G0262.1	Gh_D06G0284.1	0.0258981	0.0152872	1.69411	525	132.167	392.833			Ga06G0175.1	Gorai.010G016700.1	0.00941435	0.0537865	0.175032	417	96.3333	320.667			Gorai.007G258800.1	Gh_D11G2394.1	0.512034	3.8118	0.134329	480	111.917	368.083
Gh_A06G0263.1	Gh_D06G0285.1	0.0103331	0.0229025	0.451178	381	88.6667	292.333			Ga06G0316.1	Gorai.010G037400.1	0.0232677	0.0308924	0.753185	525	132.167	392.833			Gorai.007G259100.1	Gh_D11G2394.1	0.516751	NaN	NaN	480	112.25	367.75
Gh_A06G0617.1	Gh_D06G0699.1	0.024057	0.0484039	0.497006	381	85.3333	295.667			Ga06G0317.1	Gorai.010G037500.1	0.0173018	0.0113639	1.52253	381	88.6667	292.333			Gorai.007G259200.1	Gh_D11G2394.1	0.00634589	0	#NAME?	411	94.5	316.5
Gh_A06G0925.1	Gh_D05G0609.1	0.399282	1.15455	0.345833	186	44.4167	141.583			Ga06G0560.1	Gorai.010G062600.1	0.0161224	0.0669901	0.240669	501	124.833	376.167			Gorai.007G259300.1	Gh_D11G2394.1	0.00875539	0.0149569	0.585376	777	202.583	574.417
Gh_A06G1351.1	Gh_D06G1685.1	0.0320707	0.0504745	0.635383	537	122.917	414.083			Ga06G0718.1	Gorai.010G080600.1	0.0275576	0.0484039	0.569327	381	85.3333	295.667			Gorai.008G150100.1	Gh_Sca006802G01.1	0.0174458	0.012365	1.4109	627	163.083	463.917
Gh_A07G0267.1	Gh_D07G0323.1	0.0124795	0.051302	0.243255	525	121	404			Ga06G1182.1	Gorai.009G063200.1	0.358566	1.57969	0.226985	180	42	138			Gorai.008G241600.1	Gh_A12G2040.1	0.00529804	0.00843891	0.627811	498	119.167	378.833
Gh_A07G1347.1	Gh_D07G1459.1	0.0194091	0.0420741	0.461308	693	171.083	521.917			Ga06G1874.1	Gorai.010G186200.1	0.0384461	0.0903022	0.425749	537	123.417	413.583			Gorai.009G016300.1	Gh_D05G0140.1	0.0026178	0.0239382	0.109357	510	127.333	382.667
Gh_A07G2092.1	Gh_D07G2310.1	0.00792784	0.0253011	0.31334	501	120.583	380.417			Ga07G0391.1	Gorai.001G038300.1	0.0322564	0.0507593	0.635477	534	122.25	411.75			Gorai.009G016400.1	Gh_A05G0080.1	0.27252	0.568057	0.479741	510	120.5	389.5
Gh_A08G0530.1	Gh_D08G0624.1	0.00510098	0.0221282	0.230519	531	137.583	393.417			Ga07G1624.1	Gorai.001G173300.1	0.0238945	0.0492737	0.484934	678	167.75	510.25			Gorai.009G016500.1	Gh_D05G0142.1	0.0239807	0.00800008	2.99756	507	125.667	381.333
Gh_A09G0825.1	Gh_D09G0830.1	0.0145195	0.0662682	0.219102	357	78.8333	278.167			Ga07G2637.1	Gorai.001G270000.1	0.0159404	0.0253011	0.630028	501	120.583	380.417			Gorai.009G056400.1	Gh_A05G0427.1	0.0176869	0.0464066	0.381129	591	133.333	457.667
Gh_A09G2253.1	Gh_D09G2074.1	0.00472071	0.0360646	0.130896	567	142	425			Ga08G0680.1	Gorai.004G069900.1	0.00510098	0.0221282	0.230519	531	137.583	393.417			Gorai.009G063200.1	Gh_A05G0491.1	0.0102918	0.0327921	0.313849	516	124.667	391.333
Gh_A10G1026.1	Gh_D10G1505.1	0.0144004	0.0516174	0.278984	561	140.333	420.667			Ga08G0778.1	Gorai.004G079600.1	0.00434155	0.0472066	0.0919691	615	153	462			Gorai.009G076500.1	Gh_D05G0733.1	0.00622007	0.0107001	0.581307	834	188.25	645.75
Gh_A11G0640.1	Gh_D11G0752.1	0.00504628	0.0656156	0.0769067	525	127.333	397.667			Ga08G0779.1	Gorai.004G079700.1	0.0283655	0.0752392	0.377004	471	111.75	359.25			Gorai.009G105700.1	Gh_D04G0416.1	0.587606	NaN	NaN	414	93.6667	320.333
Gh_A11G1127.1	Gh_D11G1279.1	0.0143231	0.0295423	0.484834	561	138.083	422.917			Ga08G2069.1	Gorai.004G204400.1	0.0157624	0.0667106	0.23628	510	125.333	384.667			Gorai.009G123000.1	Gh_D05G1127.1	0	0	NaN	519	128.667	390.333
Gh_A12G1234.1	Gh_Sca006802G01.1	0.00885946	0.00636271	1.3924	612	157.833	454.167			Ga09G1021.1	Gorai.006G102000.1	0.104275	0.413169	0.252378	345	74.5	270.5			Gorai.009G131500.1	Gh_A05G1061.1	0.017928	0.0632323	0.283526	600	148.417	451.583
Gh_A12G2040.1	Gh_D11G2394.1	0.536243	2.29183	0.23398	492	119.167	372.833			Ga09G2466.1	Gorai.006G237500.1	0.0166343	0.0436487	0.381096	567	141.5	425.5			Gorai.009G136700.1	Gh_A05G1084.1	0.00240481	0.0246936	0.0973861	540	123.5	416.5
Gh_A13G0336.1	Gh_D13G0377.1	0.00937146	0.059437	0.15767	552	122.5	429.5			Ga09G2833.1	Gorai.003G111800.1	0.189563	0.704245	0.269171	543	128.083	414.917			Gorai.009G182800.1	Gh_D05G1668.1	0	0.0164616	0	513	122.833	390.167
Gh_A13G0337.1	Gh_D13G0378.1	0.0162892	0.058895	0.27658	558	123.583	434.417			Ga10G1346.1	Gorai.011G169200.1	0.014978	0.0567199	0.26407	447	109.833	337.167			Gorai.009G233600.1	Gh_D05G2145.1	0.00479044	0.020956	0.228595	564	145.167	418.833
Gh_A13G0803.1	Gh_D11G2395.1	0.218017	0.637968	0.341737	765	200.75	564.25			Ga11G1393.1	Gorai.007G259100.1	0.00803221	0.0276529	0.290465	486	110.5	375.5			Gorai.009G251600.1	Gh_D05G2289.1	0.0139823	0	#NAME?	381	92.25	288.75
Gh_A13G1113.1	Gh_D13G1384.1	0.00670645	0.0386684	0.173435	582	132.667	449.333			Ga11G1394.1	Gorai.007G259300.1	0.0176271	0.0250441	0.703845	777	203	574			Gorai.009G255000.1	Gh_A05G3693.1	0.00720294	0.0241956	0.297696	363	84	279
Gh_A13G1192.1	Gh_D13G1486.1	0.0193789	0.0641922	0.301889	651	154.417	496.583			Ga11G1398.1	Gorai.007G259100.1	0.00803579	0.0660805	0.121606	486	110.667	375.333			Gorai.009G280000.1	Gh_D05G2536.1	0.00519708	0.0079261	0.655692	513	126.833	386.167
Gh_A13G1247.1	Gh_D13G1549.1	0.0156296	0.0619364	0.25235	882	235.5	646.5			Ga11G1459.1	Gorai.007G251100.1	0.0642259	0.0887005	0.724077	465	107.583	357.417			Gorai.009G426200.1	Gh_D05G3524.1	0.0109691	0.0115165	0.952466	726	175	551
Gh_A13G1776.1	Gh_D13G2127.1	0.0147614	0.0407059	0.362635	1077	290.25	786.75			Ga11G2755.1	Gorai.007G137200.1	0.00952961	0.0369761	0.257724	561	138.583	422.417			Gorai.010G016700.1	Gh_D06G0114.1	0	0	NaN	417	96.8333	320.167
Gh_A13G2127.1	Gh_D13G0633.1	0.0159392	0.0250023	0.637509	774	203.333	570.667			Ga11G3328.1	Gorai.007G080700.1	0.00504628	0.0742364	0.0679758	525	127.333	397.667			Gorai.010G037400.1	Gh_D06G0284.1	0.0102391	0.0153458	0.667223	525	131.667	393.333
Gh_D01G1650.1	Gh_A01G1408.1	0.0158213	0.01862	0.849691	492	108.75	383.25			Ga11G3715.1	Gorai.007G041300.1	0.0257378	0.0141514	1.81875	348	71.3333	276.667			Gorai.010G037500.1	Gh_D06G0285.1	0.00685719	0	#NAME?	381	88	293
Gh_D01G1729.1	Gh_A01G1490.1	0.00710485	0.0235776	0.301339	369	86.1667	282.833			Ga12G0558.1	Gorai.008G241600.1	0.00264551	0.00842705	0.31393	498	119.333	378.667			Gorai.010G062500.1	Gh_D13G2126.1	0.291876	1.09804	0.265816	417	105.083	311.917
Gh_D02G0751.1	Gh_A05G2044.1	0.132856	0.707346	0.187824	378	89.1667	288.833			Ga12G1537.1	Gorai.008G150100.1	0.00650528	0.0185385	0.350906	627	163.833	463.167			Gorai.010G062600.1	Gh_D13G2126.1	0.413749	0.977555	0.423249	579	144	435
Gh_D02G1820.1	Gh_A03G1381.1	0.217449	0.3087	0.704403	828	197.583	630.417			Ga13G0359.1	Gorai.013G041200.1	0.0181906	0	#NAME?	501	111.5	389.5			Gorai.010G080600.1	Gh_D06G0699.1	0.00338601	0	#NAME?	381	85	296
Gh_D03G0797.1	Gh_A02G0964.1	0.0113188	0.0285239	0.396819	588	142.917	445.083			Ga13G0363.1	Gorai.013G041800.1	0.00924867	0.0418519	0.220986	558	122.833	435.167			Gorai.010G186200.1	Gh_D06G1685.1	0.00707552	0	#NAME?	552	126	426
Gh_D03G1001.1	Gh_A03G0528.1	0.00476665	0.0232427	0.205082	552	131.083	420.917			Ga13G0733.1	Gorai.013G071700.1	0.0168968	0.0263185	0.642014	732	193.333	538.667			Gorai.011G169100.1	Gh_D10G1505.1	0.11662	0.273523	0.426363	237	61.0833	175.917
Gh_D04G0416.1	Gh_A05G3188.1	0.0206376	0.11029	0.187121	510	117	393			Ga13G1659.1	Gorai.013G152100.1	0.011232	0.0384207	0.292341	582	133.5	448.5			Gorai.011G169200.1	Gh_A10G1026.1	0.0614643	0.129228	0.475626	447	110.917	336.083
Gh_D04G2021.1	Gh_A04G1079.1	0.0213538	0.0557878	0.382768	378	93	285			Ga13G1769.1	Gorai.013G163200.1	0.0173094	0.0572347	0.302429	651	154.25	496.75			Gorai.012G051300.1	Gh_D04G0416.1	0.00510423	0.0261275	0.195359	510	116.833	393.167
Gh_D05G0140.1	Gh_A05G0080.1	0.111208	0.1763	0.630788	618	151.167	466.833			Ga13G1823.1	Gorai.013G170300.1	0.0432396	0.0760144	0.568835	963	249	714			Gorai.012G133200.1	Gh_A12G1234.1	0.195769	0.558095	0.35078	345	83.8333	261.167
Gh_D05G0142.1	Gh_A05G0080.1	0.0750974	0.0950912	0.789741	501	123.167	377.833			Ga13G2480.1	Gorai.013G234400.1	0.0850541	0.209146	0.406673	1617	401.333	1215.67			Gorai.012G160600.1	Gh_D04G2021.1	0.00351083	0.0108895	0.322406	378	92.5	285.5
Gh_D05G0609.1	Gh_A05G0491.1	0.0873616	0.119293	0.732329	516	123.917	392.083			Ga13G2481.1	Gorai.013G234400.1	0.192375	0.71936	0.267425	615	159.25	455.75			Gorai.013G041800.1	Gh_D13G0377.1	0.0115922	0.0949542	0.122082	558	123.333	434.667
Gh_D05G0733.1	Gh_A05G0602.1	0.0092823	0.059634	0.155654	699	157	542			Ga13G2482.1	Gorai.013G234500.1	0.0240906	0.05967	0.403731	1068	287.667	780.333			Gorai.013G042000.1	Gh_D13G0377.1	0.00693379	0.0678428	0.102204	558	123.333	434.667
Gh_D05G1127.1	Gh_A05G1009.1	0.00775869	0.0403323	0.192369	516	127.333	388.667			Ga14G0172.1	Gorai.008G025800.1	0.0185195	0.0416774	0.444353	387	86.3333	300.667			Gorai.013G071700.1	Gh_D13G0633.1	0.00372325	0.00518585	0.717963	732	193.5	538.5
Gh_D05G1262.1	Gh_A05G1084.1	0.00482317	0	#NAME?	540	124	416			Ga14G0298.1	Gorai.013G114600.1	0.0438882	0.0606829	0.723238	897	240.167	656.833			Gorai.013G114600.1	Gh_A13G0803.1	0.0422868	0.0561413	0.75322	897	240.333	656.667
Gh_D05G1668.1	Gh_A05G1497.1	0.0155715	0.0588537	0.26458	513	123.667	389.333			Ga14G1954.1	Gorai.013G041200.1	0.0181866	0.036789	0.49435	501	111.417	389.583			Gorai.013G152100.1	Gh_D13G1384.1	0.00447429	0.0151139	0.296039	582	133.667	448.333
Gh_D05G2145.1	Gh_A05G1910.1	0.0144728	0.0571365	0.253302	564	145.417	418.583			Ga14G2716.1	Gorai.011G169100.1	0.0173585	0.0498799	0.348007	237	62.1667	174.833			Gorai.013G163200.1	Gh_D13G1486.1	0.00201073	0.00656459	0.306298	651	153	498
Gh_D05G2289.1	Gh_A05G2044.1	0.00346821	0.0109491	0.316758	381	92	289													Gorai.013G170300.1	Gh_A13G1247.1	0.0419974	0.0706404	0.594524	1026	267	759
Gh_D05G2312.1	Gh_A05G3693.1	0	0.0242936	0	363	83.6667	279.333													Gorai.013G234400.1	Gh_D13G2126.1	0.0049295	0.0176257	0.279677	1623	401.833	1221.17
Gh_D05G2536.1	Gh_A05G2275.1	0.0104327	0.0488308	0.21365	513	126.917	386.083													Gorai.013G234500.1	Gh_D13G2127.1	0.0116169	0.0283806	0.409325	1068	287.25	780.75
Gh_D05G3524.1	Gh_A04G0174.1	0.0109641	0.0232464	0.471647	726	174.75	551.25													Gorai.N013100.1	Gh_D11G2394.1	0.00631694	0.00619518	1.01965	639	162.083	476.917
Gh_D06G0114.1	Gh_A06G0135.1	0.0125789	0.0318069	0.395478	417	96.3333	320.667
Gh_D06G0284.1	Gh_A06G0262.1	0.0258981	0.0152872	1.69411	525	132.167	392.833
Gh_D06G0285.1	Gh_A06G0263.1	0.0103331	0.0229025	0.451178	381	88.6667	292.333
Gh_D06G0699.1	Gh_A06G0617.1	0.024057	0.0484039	0.497006	381	85.3333	295.667
Gh_D06G1685.1	Gh_A06G1351.1	0.0320707	0.0504745	0.635383	537	122.917	414.083
Gh_D07G0323.1	Gh_A07G0267.1	0.0124795	0.051302	0.243255	525	121	404
Gh_D07G1459.1	Gh_A07G1347.1	0.0194091	0.0420741	0.461308	693	171.083	521.917
Gh_D07G2310.1	Gh_A07G2092.1	0.00792784	0.0253011	0.31334	501	120.583	380.417
Gh_D08G0624.1	Gh_A08G0530.1	0.00510098	0.0221282	0.230519	531	137.583	393.417
Gh_D09G0830.1	Gh_A09G0825.1	0.0145195	0.0662682	0.219102	357	78.8333	278.167
Gh_D09G2074.1	Gh_A09G2253.1	0.00472071	0.0360646	0.130896	567	142	425
Gh_D09G2411.1	Gh_A03G0528.1	0.131383	0.652283	0.20142	282	63.5	218.5
Gh_D10G1505.1	Gh_A10G1026.1	0.0144004	0.0516174	0.278984	561	140.333	420.667
Gh_D11G0751.1	Gh_D11G0752.1	0.10346	0.610208	0.16955	321	77.8333	243.167
Gh_D11G0752.1	Gh_A11G0640.1	0.00504628	0.0656156	0.0769067	525	127.333	397.667
Gh_D11G1279.1	Gh_A11G1127.1	0.0143231	0.0295423	0.484834	561	138.083	422.917
Gh_D11G2394.1	Gh_D11G2395.1	0.014056	0.00994215	1.41378	777	202.5	574.5
Gh_D11G2395.1	Gh_D11G2394.1	0.014056	0.00994215	1.41378	777	202.5	574.5
Gh_D13G0377.1	Gh_A13G0336.1	0.00937146	0.059437	0.15767	552	122.5	429.5
Gh_D13G0378.1	Gh_A13G0337.1	0.0162892	0.058895	0.27658	558	123.583	434.417
Gh_D13G0633.1	Gh_A13G2127.1	0.0159392	0.0250023	0.637509	774	203.333	570.667
Gh_D13G1384.1	Gh_A13G1113.1	0.00670645	0.0386684	0.173435	582	132.667	449.333
Gh_D13G1486.1	Gh_A13G1192.1	0.0193789	0.0641922	0.301889	651	154.417	496.583
Gh_D13G1549.1	Gh_A13G1247.1	0.0156296	0.0619364	0.25235	882	235.5	646.5
Gh_D13G2126.1	Gh_A05G0080.1	0.364207	1.01353	0.359347	1218	297.75	920.25
Gh_D13G2127.1	Gh_A13G1776.1	0.0147614	0.0407059	0.362635	1077	290.25	786.75
Gh_Sca006802G01.1	Gh_A12G1234.1	0.00885946	0.00636271	1.3924	612	157.833	454.167
Gh_Sca027396G01.1	Gh_D11G1279.1	0.526922	1.25116	0.421146	441	109	332
Gh_Sca075480G01.1	Gh_D08G0624.1	0	0.0237801	0	495	128.167	366.833
