# Supplementary material for: Identification and Characterization of Phytocyanin Family Genes in Cotton Genomes
Source: Genes (Basel). 2023 Feb 28;14(3):611. doi: 10.3390/genes14030611 (PMC10048054; doi:10.3390/genes14030611)
Supplement: Supplementary file 1 [file genes-14-00611-s001.zip › Supplementary Table S4.xlsx]

## Sheet: early nodulin like protein
name	F10DPA1	F10DPA2	F10DPA3	F15DPA1	F15DPA2	F15DPA3	F20DPA1	F20DPA2	F20DPA3	F30DPA1	F30DPA2	F30DPA3	F7DPA1	F7DPA2	F7DPA3	Oa0DPA1	Oa0DPA2	Oa0DPA3	Oa1DPA1	Oa1DPA2	Oa1DPA3	Oa3DPA1	Oa3DPA2	Oa3DPA3	Oa5DPA1	Oa5DPA2	Oa5DPA3	Om1DPA1	Om1DPA2	Om1DPA3	Om3DPA1	Om3DPA2	Om3DPA3
Ghir_A01G016200	4.00705	3.19553	3.96232	1.95427	0.723295	1.14168	1.01293	1.21022	1.92503	1.5605	2.06005	1.77685	7.62951	9.30535	8.24471	0	0	0	2.1738	1.96322	1.25864	11.6034	12.5788	9.6554	8.06351	7.93285	8.18064	0	0	0	0	0	0
Ghir_A01G017010	20.2306	20.2151	20.2864	6.88287	10.7913	8.27285	3.34541	0.835194	1.32849	0.938861	2.84335	1.83935	14.8507	17.4305	18.2558	6.88948	4.36067	5.76513	14.2171	11.5163	10.8804	15.2791	14.8619	16.776	13.0176	12.6555	15.4266	3.76186	4.94238	3.99278	5.03818	6.08343	4.62198
Ghir_A02G007150	0.403116	0.436288	0.242747	0.0483032	0.0987521	0.0511463	0.103722	0	0	0	0.0492206	0.159203	1.16853	1.05315	0.905317	2.78545	2.36097	2.04588	1.86979	2.36211	2.61156	0.955998	1.18015	1.03135	1.03211	1.96924	1.54437	1.75826	1.50127	1.21378	1.36715	1.15338	0.979715
Ghir_A02G010500	1.17241	0.965458	0.76125	0.12216	0.199797	0.12935	0.314778	0.0516201	0.055834	0.0290136	0	0.0268418	4.20826	3.52588	4.35017	0.801611	0.584907	0.35335	0.630496	0.610092	0.864613	2.29685	2.55483	1.56497	3.81093	4.58181	4.83335	0.617594	0.367427	0.332548	0.596129	0.634114	0.619429
Ghir_A03G007100	0	0	0	0	0	0	0.104226	0.0512755	0	0	0	0	0	0	0	0	0	0	0	0	0	0	0	0	0	0	0	0	0	0	0	0	0
Ghir_A03G017320	148.814	184.698	157.468	188.165	291.153	251.474	7.04476	1.35481	0.136316	0	0.121565	0.0655331	0.432907	0.464477	0.465823	0.682021	1.13052	1.10917	1.53933	2.57562	1.99365	0.383683	0.612092	0.50274	0.41423	0.243181	0.476785	0.422193	0.29902	0.218589	0.669496	0.83601	0.695663
Ghir_A04G002000	5.22042	3.97266	6.83735	1.01649	1.15896	0.786543	0.0419756	0	0	0	0	0	2.83738	2.02953	2.89029	0.816285	0.194993	0.525042	2.36707	1.4644	1.26825	0.889836	0.687738	1.31803	1.54544	1.55402	1.87498	0.47437	0.470364	0.20467	0.610511	0.487059	0.317186
Ghir_A04G003340	0.406059	0.51795	0.363285	0.361443	0.184735	0.235518	0.134331	0.27903	0.317693	0.148578	0.354142	0.274911	0.443921	0.432995	0.5211	0.359362	0.277341	0.315943	0.717498	0.404996	0.341639	0.30265	0.380403	0.343688	0.608935	0.453396	0.4028	0.337352	0.334503	0.27655	0.474873	0.202053	0.126883
Ghir_A04G013970	0.324149	0.40094	0.401543	0.710234	0.907511	0.376019	0.285956	0.468935	0.557937	0.52714	0.271396	0.536448	6.01361	6.54433	4.85314	10.2832	12.3539	10.9597	15.8171	15.0565	15.7962	13.9688	13.6651	11.4732	6.73427	5.33857	5.45522	7.80973	6.9872	9.66715	9.35789	9.53942	9.54358
Ghir_D05G001760	3.77755	2.75181	3.35963	0.789224	0.427104	0.589889	0.0747667	0	0.344806	0.110262	0.307493	0.63755	4.31268	2.8438	3.843	1.15394	1.06512	0.767345	2.16571	1.59401	2.28183	2.04438	1.76944	1.9564	3.37272	3.92727	3.54844	0.727592	0.581813	0.631899	1.1554	0.963942	0.729754
Ghir_A05G005530	9.33615	9.01975	9.75751	0.151688	0.413485	0.0535387	0	0	0	0	0.103046	0	17.4672	14.2264	13.3199	0.452444	0.403494	0.783503	21.078	21.4643	15.8556	10.2573	10.0805	13.2392	23.5525	27.1067	21.6222	5.11252	4.25825	5.34693	8.8827	8.13638	9.58882
Ghir_A05G006200	4.95455	5.83263	4.18739	7.08246	8.94324	5.64655	2.05759	0.792207	0.380834	0.69264	0.594339	2.01391	8.78854	7.26674	9.97734	17.0657	16.6231	15.4938	28.3668	27.5688	26.2106	10.3893	13.5174	10.019	10.9494	11.2948	11.1557	3.45425	4.67816	4.27479	14.0687	12.37	14.1961
Ghir_D05G007560	1.03891	0.989471	0.840814	0.83655	1.42522	1.26541	0.812629	0.967902	0.546216	0.614979	1.13658	1.22542	0.269834	0.868535	0.414786	0.475276	0.516575	0.617282	0.593082	0.828951	0.861503	1.41914	1.24578	1.38774	0.766065	0.730814	0.955233	0.845857	0.958531	0.792464	0.544306	0.703058	0.686776
Ghir_A05G012210	5.02303	5.47035	5.17232	2.70847	3.50693	1.62514	1.84171	0.699415	1.54741	1.07213	1.25729	0.892685	14.7644	14.56	15.4483	20.1966	16.4205	17.7827	23.3283	20.0395	19.3177	15.3668	16.0287	16.4697	13.7287	14.7839	15.0641	13.5713	12.8533	13.7694	19.5026	20.7765	20.7532
Ghir_A05G013010	0	0	0	0	0	0	0	0	0	0	0	0	0	0	0.0484803	0	0	0	0.046213	0	0	0	0	0	0.0497432	0	0	0	0	0	0.0908837	0.0483374	0
Ghir_D05G017860	39.8975	30.9345	37.5478	24.1155	21.6522	25.3639	16.3846	17.2018	18.8213	32.8888	44.1554	39.0019	49.4061	40.0432	44.5591	28.6863	27.8946	28.9718	55.7788	49.8464	44.0253	43.387	43.2161	42.1321	42.6144	42.5462	48.6465	19.2947	18.862	23.5303	25.9267	28.0817	28.9599
Ghir_A05G022790	27.1934	28.2107	23.0663	5.40474	1.95492	3.2136	9.106	3.90888	13.7765	0.246857	0.296552	0.319729	0	0.172658	0.0865791	0	0	0	0	0.0432571	0	0.0822834	0.0812608	0.0934407	0.0444173	0	0.0415391	0.0420375	0	0	0	0	0.0421624
Ghir_A05G024630	8.48704	9.4659	7.05353	0.931562	1.39664	2.1043	0.0666786	0	0	0.442503	0	0	13.6418	15.7973	16.7484	4.13702	2.53993	3.33613	4.00668	1.80928	3.96822	1.90517	2.79189	3.48952	7.6966	9.24134	7.69427	2.13503	2.24153	2.79603	3.45492	3.15927	3.46399
Ghir_A05G027060	0.0960243	0.155889	0.185035	0.414218	0	0.194933	1.43301	1.45861	1.4725	0	0	0	0	0	0	0	0	0	0	0	0	0	0	0	0	0	0	0	0	0	0	0	0
Ghir_A05G038140	2.76296	2.48395	2.87527	3.25464	3.00476	4.44733	4.1581	5.25657	4.68843	6.09616	4.63809	6.43884	3.6831	2.8568	3.03547	3.1214	3.45814	2.58582	11.7846	14.384	10.5871	3.98242	3.41762	3.71874	4.47432	3.6816	3.36689	6.80231	6.14937	7.46258	9.06803	8.96	9.80968
Ghir_A05G043430	0	0	0	0	0	0	0	0	0	0	0	0	0	0	0	0	0	0	0	0	0	0	0	0.26753	0	0	0	0	0	0	0.116174	0	0
Ghir_A06G003420	5.49756	6.26869	2.74298	14.8217	12.9865	10.2634	2.62698	2.63447	3.0646	0.279384	0.671253	2.99826	0	0.146556	0.342955	1.07599	0.891782	0.680511	0.280214	0.489569	0.138762	0.0465627	0.0919681	0.211506	0.502699	0.239783	0.282075	1.47487	1.27372	1.92135	0.229615	0.635039	0.429461
Ghir_A06G003430	0	0	0	0	0	0	0	0	0	0	0	0	2.28619	1.05125	2.63573	0.251676	0.168336	0	0.418745	0.438959	0	0.250496	0.824609	0.284462	0.631025	1.54797	1.51749	0.25595	0.42298	0.0883449	0.411757	0.613191	0.25671
Ghir_A06G007340	1.19778	0.504132	0.641131	0.893032	0.326024	0.878052	0	0	0.0728869	0.0757501	0	0	1.79004	1.7219	1.66047	0.126841	0.699921	0.263584	1.013	0.398214	0.940571	1.26247	1.55847	1.00356	1.49928	2.73055	2.42185	0	0.319765	0.267148	0.249024	0.463561	0.646893
Ghir_A06G016540	0.203923	0.353125	0.196476	0.586438	0.439606	0.206985	0.0839512	0.165204	0.178691	0.0464275	0.159353	0	0.0756634	0.121772	0.0407083	0.272095	0.27299	0.161551	0.310436	0.406778	0.345887	0.116066	0.0764154	0.219672	0.208844	0.278927	0.156249	0.237185	0	0.040934	0.0381569	0.162353	0
Ghir_A07G003720	15.0055	15.4481	11.4798	14.6181	16.457	7.22329	3.6412	0.576525	0.757214	1.80538	0.873881	0.770876	12.5234	13.9628	12.7856	21.0839	17.5369	20.2557	26.3486	22.9157	22.8768	9.68242	13.6765	10.2068	14.1598	14.7399	13.6707	5.39989	6.2141	5.55075	15.104	13.5573	14.2317
Ghir_A07G015510	4.56394	3.42816	4.00348	20.5362	20.8922	24.8218	0.736132	0.103472	0.0746124	0	0.0998073	0.0717387	0.979394	1.35589	1.86976	1.13614	0.977033	0.708287	1.94434	1.12101	0.866554	0.452324	0.542424	0.513657	1.18596	1.59725	1.07649	1.02338	0.916538	0.991338	0.796623	0.576221	0.331104
Ghir_A07G024480	58.4789	57.5373	53.7498	13.0307	17.87	15.3686	0.692597	0.136294	0.294839	0.383027	1.3804	1.48829	0.124845	0.535797	0.403012	0.256547	0.321738	0.19992	0.25611	0.40271	0.443889	0.702196	0	0.362459	0.689184	0.460229	0.51562	0.130452	0.517401	0.60787	0.314795	0.602736	0.327098
Ghir_A08G006290	68.6781	68.072	65.2668	62.3144	61.3251	98.9732	63.7682	105.074	70.5185	44.6492	51.6683	26.5779	56.3858	67.8074	56.6959	4.17009	3.5114	3.01751	12.3403	11.3774	10.3075	177.806	150.563	230.364	75.6967	65.0379	93.0917	5.2254	3.00364	4.62669	5.33618	7.85338	7.44363
Ghir_D09G009110	0	0	0	0	0	0	0	0	0	0.131931	0	0	0	0	0	0	0	0	0.110269	0	0	0	0	0	0	0	0	0.112333	0	0.116321	0.108429	0	0.112667
Ghir_A09G022890	0.103787	0.224656	0.0999973	0.0497451	0.15255	0	0	0	0	0	0	0	0.0962733	0.154941	0.15539	0	0	0	0	0.103516	0	0	0	0	0.106292	0.253502	0.149107	0	0	0	0	0	0
Ghir_A11G007760	39.4723	36.1726	39.3459	29.846	23.9661	34.1489	9.33996	9.0778	14.4656	2.35167	3.17101	2.44758	71.5864	59.3309	68.1189	11.7079	11.3231	9.60769	27.7282	25.3139	24.6115	56.9704	55.3293	51.1443	83.3809	90.753	100.661	10.9413	11.2744	12.6256	10.0779	10.1694	7.88969
Ghir_D11G013060	14.6617	13.2725	11.8591	11.452	13.48	5.19029	7.31208	0.0916508	0.148699	0	0.265215	0.190629	19.8546	19.2309	20.4158	26.2654	27.174	26.2599	55.8858	50.279	45.3284	17.5999	20.2215	22.2775	24.4698	22.769	23.5343	9.16699	9.78544	11.7633	22.6925	24.9041	23.2275
Ghir_D12G002540	0.195574	0.317502	0.251243	0.124985	0.159701	0.231597	0.0670954	0.396103	0.571251	0	0	0.0343281	0.181415	0.194645	0.0650696	0.0621324	0	0	0.0310133	0.0975313	0	0.309206	0.0305363	0.21068	0.200294	0.191077	0.37463	0	0.031327	0	0	0.0648778	0.095063
Ghir_A12G023640	0	0	0	0	0	0	0	0	0	0	0	0	0.254617	0.546372	0.657546	0.523221	0.419953	0.598005	0.73126	0.711807	0.620777	0.781151	0.462866	0.768795	0.506006	0.429086	0.630956	0.851369	1.00246	0.991788	0.256806	0.327804	0.320212
Ghir_A13G003640	0	0	0	0	0	0	0	0	0	0	0	0	0	0	0	0	0	0	0	0	0	0	0	0	0	0	0	0	0	0.122622	0	0	0
Ghir_D13G025800	0	0	0	0.0705381	0.0721047	0	0	0	0	0	0	0	0	0	0	0.210396	0.0703625	0.145738	0	0.293569	0.0693401	0	0	0	0	0	0	0.213968	0.212162	0.221563	0.206532	0.292923	0.0715348
Ghir_A13G010380	0	0	0	0	0	0.0470546	0	0	0.0507779	0.0527726	0.0452829	0	0.0430021	0.0461381	0	0	0	0	0.0441078	0	0	0	0	0.0499388	0	0	0	0	0	0	0	0	0
Ghir_A13G013740	0	0	0.0638078	0	0.0648942	0.336104	0	0	0	0	0	0	0	0	0	0.0631187	0	0	0	0	0	0	0	0	0	0	0	0	0	0	0	0	0
Ghir_A13G014720	4.39577	3.54796	3.984	0.535648	0.949078	0.491552	0.191701	0.113172	0.0408037	0	0	0	1.20943	2.11329	1.45012	0.355043	0.641178	0.516459	1.16964	1.18895	1.75517	0.530067	0.837567	1.24401	1.06824	1.12827	1.10605	0.0722143	0.644441	0.336499	0.383375	0.48195	0.32593
Ghir_A13G015310	4.65902	3.81316	3.4839	5.26602	6.17793	4.68193	2.60032	2.32381	2.81817	18.101	13.0641	17.6004	9.30994	9.55058	8.8379	21.8927	20.6348	20.9338	15.9891	15.5819	15.3769	35.4006	30.2703	32.9097	17.2579	14.9012	16.9166	8.96421	10.6929	8.11919	15.1367	11.3724	10.1851
Ghir_A13G021280	0.159857	0	0	0	0.0783206	0.243386	0.370181	0.242822	0.21887	6.73306	8.432	8.58597	0.704344	0.556839	0.71801	13.1026	9.97388	13.3765	11.7494	11.5194	10.8834	2.1988	1.49757	1.42067	1.10507	0.976129	1.3014	6.19771	6.95195	5.37482	15.7783	10.9373	10.1012
Ghir_D13G006500	2.12673	1.42289	2.53339	0.296534	0.492571	1.02046	0	0	0	0	0	0	0	0	0	0	0	0	0.0735811	0	0	0	0	0	0	0.0377787	0	0	0	0	0	0	0
Ghir_D01G017730	1.66656	1.07589	1.324	0.756739	0.658947	0.830957	1.50459	1.89493	1.95354	0.865367	1.25663	1.07771	3.3359	2.56071	3.06425	0.027866	0	0.0289536	0.0834555	0.0583228	0.0275514	2.85674	2.82124	2.17323	3.77289	2.57091	3.58441	0.0283392	0	0.0880353	0	0.0290973	0.0284234
Ghir_D01G018560	16.8865	14.4285	12.9873	6.24775	7.2574	5.36255	1.57535	0.750018	1.40616	0.618283	0.723455	0.675999	6.64115	7.51859	11.5323	4.42354	3.58824	3.52048	8.26825	8.47041	8.37498	4.91802	6.15207	4.68066	6.27035	7.23607	6.76256	5.07295	5.69447	4.50967	3.97275	5.0121	3.50402
Ghir_D02G007560	5.03125	5.35672	3.94107	7.25401	10.4213	10.8364	2.98903	0.207113	0.761668	0.23282	0.119867	0.129235	15.6705	14.6149	13.5549	7.44615	8.13556	9.31652	21.3663	19.2564	16.3431	19.9832	18.3553	16.9205	13.6986	11.6695	12.6542	6.06601	6.28997	5.21391	6.42922	8.58932	7.15768
Ghir_D02G018560	155.551	191.104	163.362	168.297	251.015	217.226	6.03916	1.82274	1.45893	0.614694	0.703273	0.834063	0.300532	0.179138	0.179657	0.514643	1.27363	0.677324	1.81531	1.72342	2.30671	0.443933	0.438416	0.193895	0.258072	0.386881	0.551656	0.104677	0.103793	0.433568	1.07774	0.859813	0.839901
Ghir_D03G009570	0.145883	0.236831	0.175695	0.174804	0.0714744	0	0.600574	0	0	0.0415169	0	0	0.541285	0.907436	0.655247	0.903745	1.22058	0.54174	1.17981	0.691131	0.893542	0.657333	0.785829	0.628601	1.00847	1.1046	1.36229	0.459546	0.455665	0.622275	0.511816	1.19774	0.638185
Ghir_D03G011670	0	0	0	0	0	0	0	0	0	0	0	0	0	0.0619765	0	0	0	0	0	0	0	0	0	0	0	0	0	0.0603583	0	0	0	0	0
Ghir_D04G004910	27.1537	24.2345	26.5444	6.84698	6.99906	9.32141	0.175031	0.0574063	0.186278	0	0.166119	0	26.0817	22.1726	22.7461	18.1535	16.858	12.0694	76.6432	79.5516	70.0314	24.6827	27.3499	29.0066	37.7366	36.8309	33.0652	48.9566	45.0019	55.1891	41.5803	47.2198	45.4098
Ghir_D04G018430	1.49872	0.994161	2.04954	5.37593	4.87948	4.17112	2.38838	2.9375	5.71913	7.42975	5.38358	6.82266	13.5883	16.0708	13.7528	5.75967	5.17763	4.78757	10.4877	10.4636	8.20029	9.81433	13.9497	19.6341	10.4967	11.3362	11.0667	4.17053	2.60199	3.73628	4.61358	4.66699	2.44395
Ghir_D05G001760	3.77755	2.75181	3.35963	0.789224	0.427104	0.589889	0.0747667	0	0.344806	0.110262	0.307493	0.63755	4.31268	2.8438	3.843	1.15394	1.06512	0.767345	2.16571	1.59401	2.28183	2.04438	1.76944	1.9564	3.37272	3.92727	3.54844	0.727592	0.581813	0.631899	1.1554	0.963942	0.729754
Ghir_D05G001780	2.93821	2.43176	1.96498	0.563311	1.59198	1.26311	1.20961	0.945135	1.2116	75.1977	14.7554	38.5521	0.0320645	0.309626	0.379528	2.10849	2.31374	2.90963	1.08534	0.448197	0.749184	5.70558	1.13341	3.01619	0.0354013	0.101317	0.165537	1.07215	0.664433	0.624489	1.51999	0.997624	1.00812
Ghir_D05G005610	9.65705	10.8565	10.0907	1.98835	2.6989	3.00275	0.384964	0.0344344	0.186227	0	0	0.0358109	13.9415	12.6231	11.8791	25.408	28.3528	24.8843	25.6558	28.9632	25.5056	10.7091	9.68401	11.1355	11.8751	12.6907	11.2033	37.309	41.3404	40.5103	25.1004	25.3462	23.5692
Ghir_D05G006280	6.67875	8.24881	6.81337	29.8268	31.6442	15.8709	5.41817	1.03439	1.97948	2.32557	2.60953	1.90324	19.5331	21.5832	21.1752	32.351	30.2785	36.1813	47.8457	52.5848	44.2026	16.4723	19.3592	18.7059	23.7386	18.6543	20.0932	7.23503	8.60873	7.41298	26.023	22.3639	25.6652
Ghir_D05G007560	1.03891	0.989471	0.840814	0.83655	1.42522	1.26541	0.812629	0.967902	0.546216	0.614979	1.13658	1.22542	0.269834	0.868535	0.414786	0.475276	0.516575	0.617282	0.593082	0.828951	0.861503	1.41914	1.24578	1.38774	0.766065	0.730814	0.955233	0.845857	0.958531	0.792464	0.544306	0.703058	0.686776
Ghir_D05G011920	17.4055	17.4653	15.4564	11.7007	11.8363	8.43121	10.2784	4.27005	8.02183	7.07377	6.93696	6.04341	39.5547	40.1044	38.6383	57.4716	47.4745	51.5203	55.5637	53.3131	42.2436	42.6159	40.7794	38.0461	38.8656	35.5284	39.5658	37.9509	38.4227	40.9527	55.3187	55.6884	53.3508
Ghir_D05G017860	39.8975	30.9345	37.5478	24.1155	21.6522	25.3639	16.3846	17.2018	18.8213	32.8888	44.1554	39.0019	49.4061	40.0432	44.5591	28.6863	27.8946	28.9718	55.7788	49.8464	44.0253	43.387	43.2161	42.1321	42.6144	42.5462	48.6465	19.2947	18.862	23.5303	25.9267	28.0817	28.9599
Ghir_D05G022710	36.6336	44.5523	32.7771	23.556	16.0528	16.0976	2.76229	1.80017	4.61964	0.991966	2.45141	0.954418	1.35796	0.936637	0.939351	0.0996611	0.166648	0.138068	0.198982	0.173823	0.262763	0.958874	1.07757	0.9387	0.535456	1.15785	0.734447	0.472983	0.569486	0.349837	0.228272	0.312194	0.169424
Ghir_A05G024630	8.48704	9.4659	7.05353	0.931562	1.39664	2.1043	0.0666786	0	0	0.442503	0	0	13.6418	15.7973	16.7484	4.13702	2.53993	3.33613	4.00668	1.80928	3.96822	1.90517	2.79189	3.48952	7.6966	9.24134	7.69427	2.13503	2.24153	2.79603	3.45492	3.15927	3.46399
Ghir_D05G024780	0	0.134392	0	0	0	0	0	0	0	0	0	0	0	0	0	0	0	0	0.354437	0	0	0	0	0	0	0	0	0	0	0	0	0	0
Ghir_D05G027080	0	0.0743918	0.198677	0	0.134706	0	0	0.0696063	0.0752885	0	0	0	0	0	0	0	0	0	0	0	0	0	0	0	0	0	0	0	0	0	0	0	0
Ghir_D05G037420	5.40488	3.95587	3.97119	0.596385	1.60028	0.39468	0	0.0393765	0	0	0	0	2.48875	2.82504	2.44511	0.407654	0.706444	0.192529	1.88681	1.47373	1.53892	0.737714	0.728545	0.795857	1.11503	1.63357	1.26623	0.113066	0.635298	0.390265	0.873093	0.773939	0.378007
Ghir_D06G001340	0	0	0	0	0	0	0	0	0	0	0	0	0	0.0584849	0	0	0	0	0	0.0586103	0	0	0	0	0	0	0	0	0	0	0	0	0
Ghir_D06G003440	28.7821	34.9883	30.2157	233.172	177.342	270.455	166.645	166.952	269.207	7.75862	17.3635	17.8476	2.52032	1.87913	2.16037	0.482795	0.440348	0.638449	0.394341	0.321516	0.17358	0.262108	0.47456	0.496081	1.55637	1.34977	1.3232	0.758809	0.531107	0.970624	0.603183	1.14575	0.671527
Ghir_D06G003450	0	0	0	0.0936653	0	0	0	0	0	0.0556152	0	0	1.35955	0.923842	1.2191	0.046563	0	0	0.232418	0	0.50641	0.231723	0.137306	0.0526288	0.550379	1.0501	0.327546	0.0473537	0.0469538	0	0.137124	0.145861	0.0474944
Ghir_A06G007340	1.19778	0.504132	0.641131	0.893032	0.326024	0.878052	0	0	0.0728869	0.0757501	0	0	1.79004	1.7219	1.66047	0.126841	0.699921	0.263584	1.013	0.398214	0.940571	1.26247	1.55847	1.00356	1.49928	2.73055	2.42185	0	0.319765	0.267148	0.249024	0.463561	0.646893
Ghir_D06G017430	12.9826	13.7827	11.1239	2.565	2.62197	1.76036	0.764983	1.05377	0.976962	1.69223	1.64567	2.40052	3.95292	5.1782	3.06646	3.0225	2.55862	2.74791	6.36472	5.18931	6.63046	1.64518	0.789157	1.92164	2.18214	1.79126	1.32886	1.24874	1.14295	1.29307	1.2517	1.03558	1.54148
Ghir_A07G003720	15.0055	15.4481	11.4798	14.6181	16.457	7.22329	3.6412	0.576525	0.757214	1.80538	0.873881	0.770876	12.5234	13.9628	12.7856	21.0839	17.5369	20.2557	26.3486	22.9157	22.8768	9.68242	13.6765	10.2068	14.1598	14.7399	13.6707	5.39989	6.2141	5.55075	15.104	13.5573	14.2317
Ghir_D07G015760	0	0	0.0454739	0	0.0462482	0.143719	0	0	0	0	0	0	0	0.0469731	0.0942185	0.134948	0	0.327169	0.179624	0.141222	0	0.134316	0.0442155	0.101685	0.0483365	0.0922244	0.135613	0	0	0	0.0441567	0.187881	0
Ghir_D07G024530	7.31417	9.08624	7.10834	6.34068	7.97724	9.68349	0.196377	0.193221	0.487654	0.579211	1.30465	1.87549	0.884951	0.696291	1.0792	0.181851	0.243265	0.377897	0.484109	0.190305	0.239731	0	0.119166	0.411082	0.651363	0.310695	0.243662	0.493171	0.244503	0.574511	0.238015	0.569659	0.680125
Ghir_D08G006420	17.6765	19.4939	16.5905	18.6098	15.768	21.0663	24.5915	33.2082	28.1411	21.8222	20.2434	17.4283	58.915	58.4494	59.4401	0.784258	0.670268	0.724326	36.9423	29.7282	23.6929	183.957	157.374	210.542	82.7122	66.8766	72.7697	1.00435	1.08374	1.34589	1.48269	1.78947	2.01468
Ghir_D09G009110	0	0	0	0	0	0	0	0	0	0.131931	0	0	0	0	0	0	0	0	0.110269	0	0	0	0	0	0	0	0	0.112333	0	0.116321	0.108429	0	0.112667
Ghir_D09G022120	0.435113	0.418594	0.372643	0	0.331615	0.147216	0	0	0.0529549	0.0550352	0	0	0.0896914	0.288697	0.337789	0	0	0	0	0	0.0911144	0	0	0	0	0.236171	0.185217	0	0	0	0	0	0
Ghir_A09G026390	0	0	0	0	0	0	0.180046	0	0	0.696997	0.512637	1.01329	0	0	0	0	0	0	0	0	0	0	0	0	0	0	0	0	0	0	0	0	0
Ghir_D11G007700	0	0	0	0	0.162236	0	0	0	0	0	0	0	0.153579	0.0823894	0	0	0	0	0	0	0	0.157057	0.232657	0.356706	0	0.161759	0	0	0	0	0	0	0.0804766
Ghir_D11G007710	30.254	29.6128	31.1164	22.4768	18.6076	24.0761	6.79491	6.44449	11.5928	1.12346	0.964017	0.716802	100.89	82.5066	94.2268	13.7523	12.9514	11.93	31.9583	31.193	27.3864	74.1529	78.2686	67.9307	106.719	115.44	120.925	13.425	12.6575	13.4575	13.1813	12.7343	11.6453
Ghir_D11G013060	14.6617	13.2725	11.8591	11.452	13.48	5.19029	7.31208	0.0916508	0.148699	0	0.265215	0.190629	19.8546	19.2309	20.4158	26.2654	27.174	26.2599	55.8858	50.279	45.3284	17.5999	20.2215	22.2775	24.4698	22.769	23.5343	9.16699	9.78544	11.7633	22.6925	24.9041	23.2275
Ghir_A13G003640	0	0	0	0	0	0	0	0	0	0	0	0	0	0	0	0	0	0	0	0	0	0	0	0	0	0	0	0	0	0.122622	0	0	0
Ghir_D13G025800	0	0	0	0.0705381	0.0721047	0	0	0	0	0	0	0	0	0	0	0.210396	0.0703625	0.145738	0	0.293569	0.0693401	0	0	0	0	0	0	0.213968	0.212162	0.221563	0.206532	0.292923	0.0715348
Ghir_D13G006500	2.12673	1.42289	2.53339	0.296534	0.492571	1.02046	0	0	0	0	0	0	0	0	0	0	0	0	0.0735811	0	0	0	0	0	0	0.0377787	0	0	0	0	0	0	0
Ghir_D13G014420	0.764913	0.451558	0.334991	0	0.068139	0.141164	0	0	0	0	0.203773	0.2197	0.322515	0.207621	0.208223	0	0	0	0.992424	1.2484	0.655264	0	0.32572	0.0749083	0.142431	0	0	0.1348	0.0668309	0.27917	0.130115	0.622827	0.338002
Ghir_D13G015400	4.26085	4.52015	5.04011	0.606599	1.28148	0.642302	0.0868373	0.0854419	0.0924168	0.0480236	0	0	2.26967	3.69478	2.77911	0.68352	0.766446	0.751973	2.44845	1.43059	1.90815	1.36063	1.14611	1.36335	1.55537	2.30813	2.02025	0.817796	0.648712	0.592777	0.749905	1.13356	0.984272
Ghir_D13G016040	1.09191	1.83485	1.74417	1.76287	1.91465	1.74996	0.680195	0.727462	1.07011	36.0467	13.7533	20.7898	1.14613	1.25831	1.17591	23.826	21.0743	23.5039	9.2681	10.26	9.96435	13.002	5.03386	9.68855	2.26595	0.926436	1.73383	6.46149	7.34588	6.60433	16.0493	15.4134	12.3468
Ghir_D13G022120	13.9075	10.0067	11.8901	3.11505	2.38818	2.68977	1.19447	0.528872	0.847475	18.5181	22.2762	35.7712	50.4003	49.9947	51.5489	59.1955	59.4456	67.1373	37.7462	36.6938	29.4368	21.358	17.7765	19.795	33.1812	35.8686	44.1289	53.6013	49.9884	58.3966	53.4576	45.314	39.5824
Ghir_A13G021280	0.159857	0	0	0	0.0783206	0.243386	0.370181	0.242822	0.21887	6.73306	8.432	8.58597	0.704344	0.556839	0.71801	13.1026	9.97388	13.3765	11.7494	11.5194	10.8834	2.1988	1.49757	1.42067	1.10507	0.976129	1.3014	6.19771	6.95195	5.37482	15.7783	10.9373	10.1012
Ghir_D12G014730	0	0.0451558	0	0	0	0	0	0	0	0	0	0	0	0	0	0	0	0	0	0	0	0	0	0	0	0	0	0	0	0	0	0	0
Ghir_A08G007220	0	0	0	0	0	0	0.0640911	0	0	0	0	0	0	0	0	0	0	0	0.118498	0	0	0	0	0	0	0	0	0	0	0	0	0	0
Ghir_A08G006290	68.6781	68.072	65.2668	62.3144	61.3251	98.9732	63.7682	105.074	70.5185	44.6492	51.6683	26.5779	56.3858	67.8074	56.6959	4.17009	3.5114	3.01751	12.3403	11.3774	10.3075	177.806	150.563	230.364	75.6967	65.0379	93.0917	5.2254	3.00364	4.62669	5.33618	7.85338	7.44363

## Sheet: average 
name	Ghir_A01G016200	Ghir_A01G017010	Ghir_A02G007150	Ghir_A02G010500	Ghir_A03G007100	Ghir_A03G017320	Ghir_A04G002000	Ghir_A04G003340	Ghir_A04G013970	Ghir_D05G001760	Ghir_A05G005530	Ghir_A05G006200	Ghir_D05G007560	Ghir_A05G012210	Ghir_A05G013010	Ghir_D05G017860	Ghir_A05G022790	Ghir_A05G024630	Ghir_A05G027060	Ghir_A05G038140	Ghir_A05G043430	Ghir_A06G003420	Ghir_A06G003430	Ghir_A06G007340	Ghir_A06G016540	Ghir_A07G003720	Ghir_A07G015510	Ghir_A07G024480	Ghir_A08G006290	Ghir_D09G009110	Ghir_A09G022890	Ghir_A11G007760	Ghir_D11G013060	Ghir_D12G002540	Ghir_A12G023640	Ghir_A13G003640	Ghir_D13G025800	Ghir_A13G010380	Ghir_A13G013740	Ghir_A13G014720	Ghir_A13G015310	Ghir_A13G021280	Ghir_D13G006500	Ghir_D01G017730	Ghir_D01G018560	Ghir_D02G007560	Ghir_D02G018560	Ghir_D03G009570	Ghir_D03G011670
10	4.00705	20.2306	0.403116	1.17241	0	148.814	5.22042	0.406059	0.324149	3.77755	9.33615	4.95455	1.03891	5.02303	0	39.8975	27.1934	8.48704	0.0960243	2.76296	0	5.49756	0	1.19778	0.203923	15.0055	4.56394	58.4789	68.6781	0	0.103787	39.4723	14.6617	0.195574	0	0	0	0	0	4.39577	4.65902	0.159857	2.12673	1.66656	16.8865	5.03125	155.551	0.145883	0
10	3.19553	20.2151	0.436288	0.965458	0	184.698	3.97266	0.51795	0.40094	2.75181	9.01975	5.83263	0.989471	5.47035	0	30.9345	28.2107	9.4659	0.155889	2.48395	0	6.26869	0	0.504132	0.353125	15.4481	3.42816	57.5373	68.072	0	0.224656	36.1726	13.2725	0.317502	0	0	0	0	0	3.54796	3.81316	0	1.42289	1.07589	14.4285	5.35672	191.104	0.236831	0
10	3.96232	20.2864	0.242747	0.76125	0	157.468	6.83735	0.363285	0.401543	3.35963	9.75751	4.18739	0.840814	5.17232	0	37.5478	23.0663	7.05353	0.185035	2.87527	0	2.74298	0	0.641131	0.196476	11.4798	4.00348	53.7498	65.2668	0	0.0999973	39.3459	11.8591	0.251243	0	0	0	0	0.0638078	3.984	3.4839	0	2.53339	1.324	12.9873	3.94107	163.362	0.175695	0
10	3.72163	20.244	0.360717	0.966373	0	163.66	5.34347	0.429098	0.375544	3.29633	9.37114	4.99152	0.956398	5.2219	0	36.1266	26.1568	8.33549	0.14565	2.70739	0	4.83641	0	0.781013	0.251174	13.9778	3.99853	56.5887	67.339	0	0.142814	38.3302	13.2644	0.254773	0	0	0	0	0.0212693	3.97591	3.98536	0.0532855	2.02767	1.35549	14.7675	4.77635	170.006	0.186136	0
15	1.95427	6.88287	0.0483032	0.12216	0	188.165	1.01649	0.361443	0.710234	0.789224	0.151688	7.08246	0.83655	2.70847	0	24.1155	5.40474	0.931562	0.414218	3.25464	0	14.8217	0	0.893032	0.586438	14.6181	20.5362	13.0307	62.3144	0	0.0497451	29.846	11.452	0.124985	0	0	0.0705381	0	0	0.535648	5.26602	0	0.296534	0.756739	6.24775	7.25401	168.297	0.174804	0
15	0.723295	10.7913	0.0987521	0.199797	0	291.153	1.15896	0.184735	0.907511	0.427104	0.413485	8.94324	1.42522	3.50693	0	21.6522	1.95492	1.39664	0	3.00476	0	12.9865	0	0.326024	0.439606	16.457	20.8922	17.87	61.3251	0	0.15255	23.9661	13.48	0.159701	0	0	0.0721047	0	0.0648942	0.949078	6.17793	0.0783206	0.492571	0.658947	7.2574	10.4213	251.015	0.0714744	0
15	1.14168	8.27285	0.0511463	0.12935	0	251.474	0.786543	0.235518	0.376019	0.589889	0.0535387	5.64655	1.26541	1.62514	0	25.3639	3.2136	2.1043	0.194933	4.44733	0	10.2634	0	0.878052	0.206985	7.22329	24.8218	15.3686	98.9732	0	0	34.1489	5.19029	0.231597	0	0	0	0.0470546	0.336104	0.491552	4.68193	0.243386	1.02046	0.830957	5.36255	10.8364	217.226	0	0
15	1.27308	8.64901	0.0660672	0.150435	0	243.597	0.987332	0.260566	0.664588	0.602072	0.206237	7.22408	1.17573	2.61351	0	23.7105	3.52442	1.4775	0.20305	3.56891	0	12.6905	0	0.699036	0.41101	12.7661	22.0834	15.4231	74.2042	0	0.0674317	29.3203	10.0407	0.172094	0	0	0.0475476	0.0156849	0.133666	0.65876	5.37529	0.107235	0.603189	0.748881	6.28924	9.50388	212.179	0.0820927	0
20	1.01293	3.34541	0.103722	0.314778	0.104226	7.04476	0.0419756	0.134331	0.285956	0.0747667	0	2.05759	0.812629	1.84171	0	16.3846	9.106	0.0666786	1.43301	4.1581	0	2.62698	0	0	0.0839512	3.6412	0.736132	0.692597	63.7682	0	0	9.33996	7.31208	0.0670954	0	0	0	0	0	0.191701	2.60032	0.370181	0	1.50459	1.57535	2.98903	6.03916	0.600574	0
20	1.21022	0.835194	0	0.0516201	0.0512755	1.35481	0	0.27903	0.468935	0	0	0.792207	0.967902	0.699415	0	17.2018	3.90888	0	1.45861	5.25657	0	2.63447	0	0	0.165204	0.576525	0.103472	0.136294	105.074	0	0	9.0778	0.0916508	0.396103	0	0	0	0	0	0.113172	2.32381	0.242822	0	1.89493	0.750018	0.207113	1.82274	0	0
20	1.92503	1.32849	0	0.055834	0	0.136316	0	0.317693	0.557937	0.344806	0	0.380834	0.546216	1.54741	0	18.8213	13.7765	0	1.4725	4.68843	0	3.0646	0	0.0728869	0.178691	0.757214	0.0746124	0.294839	70.5185	0	0	14.4656	0.148699	0.571251	0	0	0	0.0507779	0	0.0408037	2.81817	0.21887	0	1.95354	1.40616	0.761668	1.45893	0	0
20	1.38273	1.83636	0.0345741	0.140744	0.0518338	2.84529	0.0139919	0.243684	0.437609	0.139858	0	1.07688	0.775582	1.36285	0	17.4692	8.93047	0.0222262	1.45471	4.70103	0	2.77535	0	0.0242956	0.142615	1.65831	0.304739	0.374577	79.7868	0	0	10.9611	2.51748	0.344817	0	0	0	0.016926	0	0.115226	2.58077	0.277291	0	1.78435	1.24384	1.31927	3.10694	0.200191	0
30	1.5605	0.938861	0	0.0290136	0	0	0	0.148578	0.52714	0.110262	0	0.69264	0.614979	1.07213	0	32.8888	0.246857	0.442503	0	6.09616	0	0.279384	0	0.0757501	0.0464275	1.80538	0	0.383027	44.6492	0.131931	0	2.35167	0	0	0	0	0	0.0527726	0	0	18.101	6.73306	0	0.865367	0.618283	0.23282	0.614694	0.0415169	0
30	2.06005	2.84335	0.0492206	0	0	0.121565	0	0.354142	0.271396	0.307493	0.103046	0.594339	1.13658	1.25729	0	44.1554	0.296552	0	0	4.63809	0	0.671253	0	0	0.159353	0.873881	0.0998073	1.3804	51.6683	0	0	3.17101	0.265215	0	0	0	0	0.0452829	0	0	13.0641	8.432	0	1.25663	0.723455	0.119867	0.703273	0	0
30	1.77685	1.83935	0.159203	0.0268418	0	0.0655331	0	0.274911	0.536448	0.63755	0	2.01391	1.22542	0.892685	0	39.0019	0.319729	0	0	6.43884	0	2.99826	0	0	0	0.770876	0.0717387	1.48829	26.5779	0	0	2.44758	0.190629	0.0343281	0	0	0	0	0	0	17.6004	8.58597	0	1.07771	0.675999	0.129235	0.834063	0	0
30	1.79913	1.87385	0.0694744	0.0186185	0	0.062366	0	0.25921	0.444995	0.351768	0.0343486	1.1003	0.992327	1.07404	0	38.682	0.287713	0.147501	0	5.72436	0	1.3163	0	0.02525	0.0685937	1.15005	0.057182	1.08391	40.9651	0.0439772	0	2.65675	0.151948	0.0114427	0	0	0	0.0326852	0	0	16.2552	7.91701	0	1.06657	0.672579	0.160641	0.717343	0.013839	0
7	7.62951	14.8507	1.16853	4.20826	0	0.432907	2.83738	0.443921	6.01361	4.31268	17.4672	8.78854	0.269834	14.7644	0	49.4061	0	13.6418	0	3.6831	0	0	2.28619	1.79004	0.0756634	12.5234	0.979394	0.124845	56.3858	0	0.0962733	71.5864	19.8546	0.181415	0.254617	0	0	0.0430021	0	1.20943	9.30994	0.704344	0	3.3359	6.64115	15.6705	0.300532	0.541285	0
7	9.30535	17.4305	1.05315	3.52588	0	0.464477	2.02953	0.432995	6.54433	2.8438	14.2264	7.26674	0.868535	14.56	0	40.0432	0.172658	15.7973	0	2.8568	0	0.146556	1.05125	1.7219	0.121772	13.9628	1.35589	0.535797	67.8074	0	0.154941	59.3309	19.2309	0.194645	0.546372	0	0	0.0461381	0	2.11329	9.55058	0.556839	0	2.56071	7.51859	14.6149	0.179138	0.907436	0.0619765
7	8.24471	18.2558	0.905317	4.35017	0	0.465823	2.89029	0.5211	4.85314	3.843	13.3199	9.97734	0.414786	15.4483	0.0484803	44.5591	0.0865791	16.7484	0	3.03547	0	0.342955	2.63573	1.66047	0.0407083	12.7856	1.86976	0.403012	56.6959	0	0.15539	68.1189	20.4158	0.0650696	0.657546	0	0	0	0	1.45012	8.8379	0.71801	0	3.06425	11.5323	13.5549	0.179657	0.655247	0
7	8.39319	16.8457	1.04233	4.0281	0	0.454402	2.58573	0.466005	5.80369	3.66649	15.0045	8.67754	0.517718	14.9242	0.0161601	44.6695	0.0864124	15.3958	0	3.19179	0	0.16317	1.99105	1.72414	0.0793812	13.0906	1.40168	0.354551	60.2964	0	0.135535	66.3454	19.8338	0.147043	0.486178	0	0	0.0297134	0	1.59095	9.23281	0.659731	0	2.98695	8.56403	14.6134	0.219776	0.701322	0.0206588
0	0	6.88948	2.78545	0.801611	0	0.682021	0.816285	0.359362	10.2832	1.15394	0.452444	17.0657	0.475276	20.1966	0	28.6863	0	4.13702	0	3.1214	0	1.07599	0.251676	0.126841	0.272095	21.0839	1.13614	0.256547	4.17009	0	0	11.7079	26.2654	0.0621324	0.523221	0	0.210396	0	0.0631187	0.355043	21.8927	13.1026	0	0.027866	4.42354	7.44615	0.514643	0.903745	0
0	0	4.36067	2.36097	0.584907	0	1.13052	0.194993	0.277341	12.3539	1.06512	0.403494	16.6231	0.516575	16.4205	0	27.8946	0	2.53993	0	3.45814	0	0.891782	0.168336	0.699921	0.27299	17.5369	0.977033	0.321738	3.5114	0	0	11.3231	27.174	0	0.419953	0	0.0703625	0	0	0.641178	20.6348	9.97388	0	0	3.58824	8.13556	1.27363	1.22058	0
0	0	5.76513	2.04588	0.35335	0	1.10917	0.525042	0.315943	10.9597	0.767345	0.783503	15.4938	0.617282	17.7827	0	28.9718	0	3.33613	0	2.58582	0	0.680511	0	0.263584	0.161551	20.2557	0.708287	0.19992	3.01751	0	0	9.60769	26.2599	0	0.598005	0	0.145738	0	0	0.516459	20.9338	13.3765	0	0.0289536	3.52048	9.31652	0.677324	0.54174	0
0	0	5.67176	2.39743	0.579956	0	0.973906	0.512107	0.317549	11.1989	0.995467	0.54648	16.3942	0.536378	18.1332	0	28.5176	0	3.33769	0	3.05512	0	0.88276	0.140004	0.363449	0.235545	19.6255	0.940485	0.259402	3.56634	0	0	10.8796	26.5664	0.0207108	0.513726	0	0.142165	0	0.0210396	0.504227	21.1538	12.151	0	0.0189399	3.84408	8.29941	0.821865	0.888688	0
1	2.1738	14.2171	1.86979	0.630496	0	1.53933	2.36707	0.717498	15.8171	2.16571	21.078	28.3668	0.593082	23.3283	0.046213	55.7788	0	4.00668	0	11.7846	0	0.280214	0.418745	1.013	0.310436	26.3486	1.94434	0.25611	12.3403	0.110269	0	27.7282	55.8858	0.0310133	0.73126	0	0	0.0441078	0	1.16964	15.9891	11.7494	0.0735811	0.0834555	8.26825	21.3663	1.81531	1.17981	0
1	1.96322	11.5163	2.36211	0.610092	0	2.57562	1.4644	0.404996	15.0565	1.59401	21.4643	27.5688	0.828951	20.0395	0	49.8464	0.0432571	1.80928	0	14.384	0	0.489569	0.438959	0.398214	0.406778	22.9157	1.12101	0.40271	11.3774	0	0.103516	25.3139	50.279	0.0975313	0.711807	0	0.293569	0	0	1.18895	15.5819	11.5194	0	0.0583228	8.47041	19.2564	1.72342	0.691131	0
1	1.25864	10.8804	2.61156	0.864613	0	1.99365	1.26825	0.341639	15.7962	2.28183	15.8556	26.2106	0.861503	19.3177	0	44.0253	0	3.96822	0	10.5871	0	0.138762	0	0.940571	0.345887	22.8768	0.866554	0.443889	10.3075	0	0	24.6115	45.3284	0	0.620777	0	0.0693401	0	0	1.75517	15.3769	10.8834	0	0.0275514	8.37498	16.3431	2.30671	0.893542	0
1	1.79855	12.2046	2.28115	0.701733	0	2.0362	1.69991	0.488045	15.5566	2.01385	19.466	27.3821	0.761179	20.8952	0.0154043	49.8835	0.014419	3.26139	0	12.2519	0	0.302848	0.285901	0.783929	0.354367	24.047	1.31064	0.367569	11.3417	0.0367565	0.0345053	25.8845	50.4977	0.0428482	0.687948	0	0.12097	0.0147026	0	1.37126	15.6493	11.3841	0	0.0564432	8.37121	18.9886	1.94848	0.921493	0
3	11.6034	15.2791	0.955998	2.29685	0	0.383683	0.889836	0.30265	13.9688	2.04438	10.2573	10.3893	1.41914	15.3668	0	43.387	0.0822834	1.90517	0	3.98242	0	0.0465627	0.250496	1.26247	0.116066	9.68242	0.452324	0.702196	177.806	0	0	56.9704	17.5999	0.309206	0.781151	0	0	0	0	0.530067	35.4006	2.1988	0	2.85674	4.91802	19.9832	0.443933	0.657333	0
3	12.5788	14.8619	1.18015	2.55483	0	0.612092	0.687738	0.380403	13.6651	1.76944	10.0805	13.5174	1.24578	16.0287	0	43.2161	0.0812608	2.79189	0	3.41762	0	0.0919681	0.824609	1.55847	0.0764154	13.6765	0.542424	0	150.563	0	0	55.3293	20.2215	0.0305363	0.462866	0	0	0	0	0.837567	30.2703	1.49757	0	2.82124	6.15207	18.3553	0.438416	0.785829	0
3	9.6554	16.776	1.03135	1.56497	0	0.50274	1.31803	0.343688	11.4732	1.9564	13.2392	10.019	1.38774	16.4697	0	42.1321	0.0934407	3.48952	0	3.71874	0.26753	0.211506	0.284462	1.00356	0.219672	10.2068	0.513657	0.362459	230.364	0	0	51.1443	22.2775	0.21068	0.768795	0	0	0.0499388	0	1.24401	32.9097	1.42067	0	2.17323	4.68066	16.9205	0.193895	0.628601	0
3	11.2792	15.639	1.05583	2.13888	0	0.499505	0.965203	0.342247	13.0357	1.92341	11.1923	11.3086	1.35089	15.955	0	42.9117	0.0856616	2.72886	0	3.70626	0.0891765	0.116679	0.453189	1.27483	0.137384	11.1886	0.502802	0.354885	186.244	0	0	54.4813	20.033	0.183474	0.670938	0	0	0.0166463	0	0.870549	32.8602	1.70568	0	2.61707	5.25025	18.4196	0.358748	0.690588	0
5	8.06351	13.0176	1.03211	3.81093	0	0.41423	1.54544	0.608935	6.73427	3.37272	23.5525	10.9494	0.766065	13.7287	0.0497432	42.6144	0.0444173	7.6966	0	4.47432	0	0.502699	0.631025	1.49928	0.208844	14.1598	1.18596	0.689184	75.6967	0	0.106292	83.3809	24.4698	0.200294	0.506006	0	0	0	0	1.06824	17.2579	1.10507	0	3.77289	6.27035	13.6986	0.258072	1.00847	0
5	7.93285	12.6555	1.96924	4.58181	0	0.243181	1.55402	0.453396	5.33857	3.92727	27.1067	11.2948	0.730814	14.7839	0	42.5462	0	9.24134	0	3.6816	0	0.239783	1.54797	2.73055	0.278927	14.7399	1.59725	0.460229	65.0379	0	0.253502	90.753	22.769	0.191077	0.429086	0	0	0	0	1.12827	14.9012	0.976129	0.0377787	2.57091	7.23607	11.6695	0.386881	1.1046	0
5	8.18064	15.4266	1.54437	4.83335	0	0.476785	1.87498	0.4028	5.45522	3.54844	21.6222	11.1557	0.955233	15.0641	0	48.6465	0.0415391	7.69427	0	3.36689	0	0.282075	1.51749	2.42185	0.156249	13.6707	1.07649	0.51562	93.0917	0	0.149107	100.661	23.5343	0.37463	0.630956	0	0	0	0	1.10605	16.9166	1.3014	0	3.58441	6.76256	12.6542	0.551656	1.36229	0
5	8.059	13.6999	1.51524	4.4087	0	0.378065	1.65815	0.488377	5.84269	3.61615	24.0938	11.1333	0.817371	14.5256	0.0165811	44.6024	0.0286521	8.21074	0	3.84093	0	0.341519	1.23216	2.21723	0.214673	14.1902	1.28657	0.555011	77.9421	0	0.169634	91.5983	23.591	0.255334	0.522016	0	0	0	0	1.10085	16.3586	1.12753	0.0125929	3.3094	6.75633	12.6741	0.39887	1.15845	0
-1	0	3.76186	1.75826	0.617594	0	0.422193	0.47437	0.337352	7.80973	0.727592	5.11252	3.45425	0.845857	13.5713	0	19.2947	0.0420375	2.13503	0	6.80231	0	1.47487	0.25595	0	0.237185	5.39989	1.02338	0.130452	5.2254	0.112333	0	10.9413	9.16699	0	0.851369	0	0.213968	0	0	0.0722143	8.96421	6.19771	0	0.0283392	5.07295	6.06601	0.104677	0.459546	0.0603583
-1	0	4.94238	1.50127	0.367427	0	0.29902	0.470364	0.334503	6.9872	0.581813	4.25825	4.67816	0.958531	12.8533	0	18.862	0	2.24153	0	6.14937	0	1.27372	0.42298	0.319765	0	6.2141	0.916538	0.517401	3.00364	0	0	11.2744	9.78544	0.031327	1.00246	0	0.212162	0	0	0.644441	10.6929	6.95195	0	0	5.69447	6.28997	0.103793	0.455665	0
-1	0	3.99278	1.21378	0.332548	0	0.218589	0.20467	0.27655	9.66715	0.631899	5.34693	4.27479	0.792464	13.7694	0	23.5303	0	2.79603	0	7.46258	0	1.92135	0.0883449	0.267148	0.040934	5.55075	0.991338	0.60787	4.62669	0.116321	0	12.6256	11.7633	0	0.991788	0.122622	0.221563	0	0	0.336499	8.11919	5.37482	0	0.0880353	4.50967	5.21391	0.433568	0.622275	0
-1	0	4.23234	1.49111	0.43919	0	0.313267	0.383135	0.316135	8.15469	0.647101	4.9059	4.13573	0.865617	13.398	0	20.5623	0.0140125	2.39087	0	6.80475	0	1.55665	0.255758	0.195638	0.0927063	5.72158	0.977085	0.418574	4.28524	0.0762181	0	11.6138	10.2386	0.0104423	0.94854	0.0408741	0.215898	0	0	0.351052	9.25878	6.17483	0	0.0387915	5.09236	5.85663	0.214012	0.512496	0.0201194
-3	0	5.03818	1.36715	0.596129	0	0.669496	0.610511	0.474873	9.35789	1.1554	8.8827	14.0687	0.544306	19.5026	0.0908837	25.9267	0	3.45492	0	9.06803	0.116174	0.229615	0.411757	0.249024	0.0381569	15.104	0.796623	0.314795	5.33618	0.108429	0	10.0779	22.6925	0	0.256806	0	0.206532	0	0	0.383375	15.1367	15.7783	0	0	3.97275	6.42922	1.07774	0.511816	0
-3	0	6.08343	1.15338	0.634114	0	0.83601	0.487059	0.202053	9.53942	0.963942	8.13638	12.37	0.703058	20.7765	0.0483374	28.0817	0	3.15927	0	8.96	0	0.635039	0.613191	0.463561	0.162353	13.5573	0.576221	0.602736	7.85338	0	0	10.1694	24.9041	0.0648778	0.327804	0	0.292923	0	0	0.48195	11.3724	10.9373	0	0.0290973	5.0121	8.58932	0.859813	1.19774	0
-3	0	4.62198	0.979715	0.619429	0	0.695663	0.317186	0.126883	9.54358	0.729754	9.58882	14.1961	0.686776	20.7532	0	28.9599	0.0421624	3.46399	0	9.80968	0	0.429461	0.25671	0.646893	0	14.2317	0.331104	0.327098	7.44363	0.112667	0	7.88969	23.2275	0.095063	0.320212	0	0.0715348	0	0	0.32593	10.1851	10.1012	0	0.0284234	3.50402	7.15768	0.839901	0.638185	0
-3	0	5.24786	1.16675	0.616557	0	0.733723	0.471585	0.267936	9.48029	0.9497	8.8693	13.5449	0.644714	20.3441	0.046407	27.6561	0.0140541	3.35939	0	9.27924	0.0387247	0.431372	0.427219	0.453159	0.0668367	14.2977	0.567983	0.414876	6.87773	0.0736988	0	9.37898	23.608	0.0533136	0.301607	0	0.19033	0	0	0.397085	12.2314	12.2723	0	0.0191736	4.16295	7.39207	0.925819	0.782582	0
[truncated: 40 more columns]

## Sheet: Sheet1
DPA	Ghir_A01G016200	Ghir_A01G017010	Ghir_A02G007150	Ghir_A02G010500	Ghir_A03G007100	Ghir_A03G017320	Ghir_A04G002000	Ghir_A04G003340	Ghir_A04G013970	Ghir_D05G001760	Ghir_A05G005530	Ghir_A05G006200	Ghir_D05G007560	Ghir_A05G012210	Ghir_A05G013010	Ghir_D05G017860	Ghir_A05G022790	Ghir_A05G024630	Ghir_A05G027060	Ghir_A05G038140	Ghir_A05G043430	Ghir_A06G003420	Ghir_A06G003430	Ghir_A06G007340	Ghir_A06G016540	Ghir_A07G003720	Ghir_A07G015510	Ghir_A07G024480	Ghir_A08G006290	Ghir_D09G009110	Ghir_A09G022890	Ghir_A11G007760	Ghir_D11G013060	Ghir_D12G002540	Ghir_A12G023640	Ghir_A13G003640	Ghir_D13G025800	Ghir_A13G010380	Ghir_A13G013740	Ghir_A13G014720	Ghir_A13G015310	Ghir_A13G021280	Ghir_D13G006500	Ghir_D01G017730	Ghir_D01G018560	Ghir_D02G007560	Ghir_D02G018560	Ghir_D03G009570	Ghir_D03G011670
-3	0	5.24786	1.16675	0.616557	0	0.733723	0.471585	0.267936	9.48029	0.9497	8.8693	13.5449	0.644714	20.3441	0.046407	27.6561	0.0140541	3.35939	0	9.27924	0.0387247	0.431372	0.427219	0.453159	0.0668367	14.2977	0.567983	0.414876	6.87773	0.0736988	0	9.37898	23.608	0.0533136	0.301607	0	0.19033	0	0	0.397085	12.2314	12.2723	0	0.0191736	4.16295	7.39207	0.925819	0.782582	0
-1	0	4.23234	1.49111	0.43919	0	0.313267	0.383135	0.316135	8.15469	0.647101	4.9059	4.13573	0.865617	13.398	0	20.5623	0.0140125	2.39087	0	6.80475	0	1.55665	0.255758	0.195638	0.0927063	5.72158	0.977085	0.418574	4.28524	0.0762181	0	11.6138	10.2386	0.0104423	0.94854	0.0408741	0.215898	0	0	0.351052	9.25878	6.17483	0	0.0387915	5.09236	5.85663	0.214012	0.512496	0.0201194
0	0	5.67176	2.39743	0.579956	0	0.973906	0.512107	0.317549	11.1989	0.995467	0.54648	16.3942	0.536378	18.1332	0	28.5176	0	3.33769	0	3.05512	0	0.88276	0.140004	0.363449	0.235545	19.6255	0.940485	0.259402	3.56634	0	0	10.8796	26.5664	0.0207108	0.513726	0	0.142165	0	0.0210396	0.504227	21.1538	12.151	0	0.0189399	3.84408	8.29941	0.821865	0.888688	0
1	1.79855	12.2046	2.28115	0.701733	0	2.0362	1.69991	0.488045	15.5566	2.01385	19.466	27.3821	0.761179	20.8952	0.0154043	49.8835	0.014419	3.26139	0	12.2519	0	0.302848	0.285901	0.783929	0.354367	24.047	1.31064	0.367569	11.3417	0.0367565	0.0345053	25.8845	50.4977	0.0428482	0.687948	0	0.12097	0.0147026	0	1.37126	15.6493	11.3841	0	0.0564432	8.37121	18.9886	1.94848	0.921493	0
3	11.2792	15.639	1.05583	2.13888	0	0.499505	0.965203	0.342247	13.0357	1.92341	11.1923	11.3086	1.35089	15.955	0	42.9117	0.0856616	2.72886	0	3.70626	0.0891765	0.116679	0.453189	1.27483	0.137384	11.1886	0.502802	0.354885	186.244	0	0	54.4813	20.033	0.183474	0.670938	0	0	0.0166463	0	0.870549	32.8602	1.70568	0	2.61707	5.25025	18.4196	0.358748	0.690588	0
5	8.059	13.6999	1.51524	4.4087	0	0.378065	1.65815	0.488377	5.84269	3.61615	24.0938	11.1333	0.817371	14.5256	0.0165811	44.6024	0.0286521	8.21074	0	3.84093	0	0.341519	1.23216	2.21723	0.214673	14.1902	1.28657	0.555011	77.9421	0	0.169634	91.5983	23.591	0.255334	0.522016	0	0	0	0	1.10085	16.3586	1.12753	0.0125929	3.3094	6.75633	12.6741	0.39887	1.15845	0
7	8.39319	16.8457	1.04233	4.0281	0	0.454402	2.58573	0.466005	5.80369	3.66649	15.0045	8.67754	0.517718	14.9242	0.0161601	44.6695	0.0864124	15.3958	0	3.19179	0	0.16317	1.99105	1.72414	0.0793812	13.0906	1.40168	0.354551	60.2964	0	0.135535	66.3454	19.8338	0.147043	0.486178	0	0	0.0297134	0	1.59095	9.23281	0.659731	0	2.98695	8.56403	14.6134	0.219776	0.701322	0.0206588
10	3.72163	20.244	0.360717	0.966373	0	163.66	5.34347	0.429098	0.375544	3.29633	9.37114	4.99152	0.956398	5.2219	0	36.1266	26.1568	8.33549	0.14565	2.70739	0	4.83641	0	0.781013	0.251174	13.9778	3.99853	56.5887	67.339	0	0.142814	38.3302	13.2644	0.254773	0	0	0	0	0.0212693	3.97591	3.98536	0.0532855	2.02767	1.35549	14.7675	4.77635	170.006	0.186136	0
15	1.27308	8.64901	0.0660672	0.150435	0	243.597	0.987332	0.260566	0.664588	0.602072	0.206237	7.22408	1.17573	2.61351	0	23.7105	3.52442	1.4775	0.20305	3.56891	0	12.6905	0	0.699036	0.41101	12.7661	22.0834	15.4231	74.2042	0	0.0674317	29.3203	10.0407	0.172094	0	0	0.0475476	0.0156849	0.133666	0.65876	5.37529	0.107235	0.603189	0.748881	6.28924	9.50388	212.179	0.0820927	0
20	1.38273	1.83636	0.0345741	0.140744	0.0518338	2.84529	0.0139919	0.243684	0.437609	0.139858	0	1.07688	0.775582	1.36285	0	17.4692	8.93047	0.0222262	1.45471	4.70103	0	2.77535	0	0.0242956	0.142615	1.65831	0.304739	0.374577	79.7868	0	0	10.9611	2.51748	0.344817	0	0	0	0.016926	0	0.115226	2.58077	0.277291	0	1.78435	1.24384	1.31927	3.10694	0.200191	0
30	1.79913	1.87385	0.0694744	0.0186185	0	0.062366	0	0.25921	0.444995	0.351768	0.0343486	1.1003	0.992327	1.07404	0	38.682	0.287713	0.147501	0	5.72436	0	1.3163	0	0.02525	0.0685937	1.15005	0.057182	1.08391	40.9651	0.0439772	0	2.65675	0.151948	0.0114427	0	0	0	0.0326852	0	0	16.2552	7.91701	0	1.06657	0.672579	0.160641	0.717343	0.013839	0
[truncated: 40 more columns]

## Sheet: Sheet2
Gene	003DPA	001DPA	0DPA	1DPA	3DPA	5DPA	7DPA	10DPA	15DPA	20DPA	30DPA
Ghir_A01G016200	0	0	0	1.79855	11.2792	8.059	8.39319	3.72163	1.27308	1.38273	1.79913
Ghir_A01G017010	5.24786	4.23234	5.67176	12.2046	15.639	13.6999	16.8457	20.244	8.64901	1.83636	1.87385
Ghir_A02G007150	1.16675	1.49111	2.39743	2.28115	1.05583	1.51524	1.04233	0.360717	0.0660672	0.0345741	0.0694744
Ghir_A02G010500	0.616557	0.43919	0.579956	0.701733	2.13888	4.4087	4.0281	0.966373	0.150435	0.140744	0.0186185
Ghir_A03G007100	0	0	0	0	0	0	0	0	0	0.0518338	0
Ghir_A03G017320	0.733723	0.313267	0.973906	2.0362	0.499505	0.378065	0.454402	163.66	243.597	2.84529	0.062366
Ghir_A04G002000	0.471585	0.383135	0.512107	1.69991	0.965203	1.65815	2.58573	5.34347	0.987332	0.0139919	0
Ghir_A04G003340	0.267936	0.316135	0.317549	0.488045	0.342247	0.488377	0.466005	0.429098	0.260566	0.243684	0.25921
Ghir_A04G013970	9.48029	8.15469	11.1989	15.5566	13.0357	5.84269	5.80369	0.375544	0.664588	0.437609	0.444995
Ghir_A05G005530	8.8693	4.9059	0.54648	19.466	11.1923	24.0938	15.0045	9.37114	0.206237	0	0.0343486
Ghir_A05G006200	13.5449	4.13573	16.3942	27.3821	11.3086	11.1333	8.67754	4.99152	7.22408	1.07688	1.1003
Ghir_D05G007560	0.644714	0.865617	0.536378	0.761179	1.35089	0.817371	0.517718	0.956398	1.17573	0.775582	0.992327
Ghir_A05G012210	20.3441	13.398	18.1332	20.8952	15.955	14.5256	14.9242	5.2219	2.61351	1.36285	1.07404
Ghir_A05G013010	0.046407	0	0	0.0154043	0	0.0165811	0.0161601	0	0	0	0
Ghir_A05G022790	0.0140541	0.0140125	0	0.014419	0.0856616	0.0286521	0.0864124	26.1568	3.52442	8.93047	0.287713
Ghir_A05G024630	3.35939	2.39087	3.33769	3.26139	2.72886	8.21074	15.3958	8.33549	1.4775	0.0222262	0.147501
Ghir_A05G027060	0	0	0	0	0	0	0	0.14565	0.20305	1.45471	0
Ghir_A05G038140	9.27924	6.80475	3.05512	12.2519	3.70626	3.84093	3.19179	2.70739	3.56891	4.70103	5.72436
Ghir_A05G043430	0.0387247	0	0	0	0.0891765	0	0	0	0	0	0
Ghir_A06G003420	0.431372	1.55665	0.88276	0.302848	0.116679	0.341519	0.16317	4.83641	12.6905	2.77535	1.3163
Ghir_A06G003430	0.427219	0.255758	0.140004	0.285901	0.453189	1.23216	1.99105	0	0	0	0
Ghir_A06G016540	0.0668367	0.0927063	0.235545	0.354367	0.137384	0.214673	0.0793812	0.251174	0.41101	0.142615	0.0685937
Ghir_A07G003720	14.2977	5.72158	19.6255	24.047	11.1886	14.1902	13.0906	13.9778	12.7661	1.65831	1.15005
Ghir_A07G015510	0.567983	0.977085	0.940485	1.31064	0.502802	1.28657	1.40168	3.99853	22.0834	0.304739	0.057182
Ghir_A07G024480	0.414876	0.418574	0.259402	0.367569	0.354885	0.555011	0.354551	56.5887	15.4231	0.374577	1.08391
Ghir_A09G022890	0	0	0	0.0345053	0	0.169634	0.135535	0.142814	0.0674317	0	0
Ghir_A11G007760	9.37898	11.6138	10.8796	25.8845	54.4813	91.5983	66.3454	38.3302	29.3203	10.9611	2.65675
Ghir_D11G013060	23.608	10.2386	26.5664	50.4977	20.033	23.591	19.8338	13.2644	10.0407	2.51748	0.151948
Ghir_D12G002540	0.0533136	0.0104423	0.0207108	0.0428482	0.183474	0.255334	0.147043	0.254773	0.172094	0.344817	0.0114427
Ghir_A12G023640	0.301607	0.94854	0.513726	0.687948	0.670938	0.522016	0.486178	0	0	0	0
Ghir_D13G025800	0.19033	0.215898	0.142165	0.12097	0	0	0	0	0.0475476	0	0
Ghir_A13G010380	0	0	0	0.0147026	0.0166463	0	0.0297134	0	0.0156849	0.016926	0.0326852
Ghir_A13G013740	0	0	0.0210396	0	0	0	0	0.0212693	0.133666	0	0
Ghir_A13G014720	0.397085	0.351052	0.504227	1.37126	0.870549	1.10085	1.59095	3.97591	0.65876	0.115226	0
Ghir_A13G015310	12.2314	9.25878	21.1538	15.6493	32.8602	16.3586	9.23281	3.98536	5.37529	2.58077	16.2552
Ghir_D01G017730	0.0191736	0.0387915	0.0189399	0.0564432	2.61707	3.3094	2.98695	1.35549	0.748881	1.78435	1.06657
Ghir_D01G018560	4.16295	5.09236	3.84408	8.37121	5.25025	6.75633	8.56403	14.7675	6.28924	1.24384	0.672579
Ghir_D02G007560	7.39207	5.85663	8.29941	18.9886	18.4196	12.6741	14.6134	4.77635	9.50388	1.31927	0.160641
Ghir_D02G018560	0.925819	0.214012	0.821865	1.94848	0.358748	0.39887	0.219776	170.006	212.179	3.10694	0.717343
Ghir_D03G009570	0.782582	0.512496	0.888688	0.921493	0.690588	1.15845	0.701322	0.186136	0.0820927	0.200191	0.013839
Ghir_D03G011670	0	0.0201194	0	0	0	0	0.0206588	0	0	0	0
Ghir_D04G004910	44.7366	49.7159	15.6936	75.4087	27.0131	35.8775	23.6668	25.9775	7.72248	0.139572	0.0553732
Ghir_D04G018430	3.90818	3.50293	5.24163	9.71721	14.4661	10.9665	14.4706	1.51414	4.80884	3.68167	6.54533
Ghir_D05G001760	0.9497	0.647101	0.995467	2.01385	1.92341	3.61615	3.66649	3.29633	0.602072	0.139858	0.351768
Ghir_D05G001780	1.17524	0.787023	2.44395	0.760905	3.28506	0.100752	0.240406	2.44498	1.13947	1.12211	42.8351
Ghir_D05G005610	24.672	39.7199	26.215	26.7082	10.5095	11.923	12.8146	10.2014	2.56333	0.201875	0.011937
Ghir_D05G006280	24.684	7.75225	32.9369	48.211	18.1792	20.8287	20.7639	7.24698	25.7807	2.81068	2.27944
Ghir_D05G011920	54.786	39.1088	52.1555	50.3735	40.4805	37.9866	39.4325	16.7757	10.6561	7.52344	6.68472
Ghir_D05G017860	27.6561	20.5623	28.5176	49.8835	42.9117	44.6024	44.6695	36.1266	23.7105	17.4692	38.682
Ghir_D05G022710	0.23663	0.464102	0.134792	0.211856	0.991715	0.809251	1.07798	37.9876	18.5688	3.0607	1.46593
Ghir_D05G024780	0	0	0	0.118146	0	0	0	0.0447975	0	0	0
Ghir_D05G027080	0	0	0	0	0	0	0	0.0910228	0.0449021	0.0482983	0
Ghir_D05G037420	0.675013	0.379543	0.435542	1.63315	0.754039	1.33827	2.5863	4.44398	0.863782	0.0131255	0
Ghir_D06G001340	0	0	0	0.0195368	0	0	0.019495	0	0	0	0
Ghir_D06G003440	0.806818	0.753513	0.520531	0.296479	0.410916	1.40978	2.18661	31.3287	226.99	200.935	14.3232
Ghir_D06G003450	0.11016	0.0314358	0.015521	0.246276	0.140553	0.642677	1.1675	0	0.0312218	0	0.0185384
Ghir_A06G007340	0.453159	0.195638	0.363449	0.783929	1.27483	2.21723	1.72414	0.781013	0.699036	0.0242956	0.02525
Ghir_D06G017430	1.27625	1.22825	2.77634	6.0615	1.45199	1.76742	4.06586	12.6297	2.31578	0.931904	1.91281
Ghir_D07G015760	0.0773461	0	0.154039	0.106949	0.0934055	0.0920579	0.0470639	0.015158	0.0633223	0	0
Ghir_D07G024530	0.495933	0.437395	0.267671	0.304715	0.176749	0.401907	0.886815	7.83625	8.00047	0.292417	1.25311
Ghir_D08G006420	1.76228	1.14466	0.726284	30.1211	183.958	74.1195	58.9348	17.9203	18.4814	28.647	19.8313
Ghir_D09G009110	0.0736988	0.0762181	0	0.0367565	0	0	0	0	0	0	0.0439772
Ghir_D09G022120	0	0	0	0.0303715	0	0.140463	0.238726	0.408784	0.15961	0.0176516	0.0183451
Ghir_A09G026390	0	0	0	0	0	0	0	0	0	0.0600154	0.740975
Ghir_D11G007700	0.0268255	0	0	0	0.248807	0.0539195	0.0786561	0	0.0540785	0	0
Ghir_D11G007710	12.5203	13.18	12.8779	30.1793	73.4507	114.361	92.5411	30.3277	21.7202	8.27739	0.93476
Ghir_A13G003640	0	0.0408741	0	0	0	0	0	0	0	0	0
Ghir_D13G006500	0	0	0	0.024527	0	0.0125929	0	2.02767	0.603189	0	0
Ghir_D13G014420	0.363648	0.160267	0	0.965363	0.133543	0.0474771	0.24612	0.517154	0.0697676	0	0.141158
Ghir_D13G015400	0.955912	0.686429	0.73398	1.92906	1.29003	1.96125	2.91452	4.60703	0.843461	0.088232	0.0160079
Ghir_D13G016040	14.6032	6.8039	22.8014	9.83083	9.24146	1.64207	1.19345	1.55697	1.80916	0.825923	23.5299
Ghir_D13G022120	46.118	53.9954	61.9261	34.6256	19.6431	37.7262	50.648	11.9348	2.731	0.856938	25.5218
Ghir_A13G021280	12.2723	6.17483	12.151	11.3841	1.70568	1.12753	0.659731	0.0532855	0.107235	0.277291	7.91701
Ghir_D12G014730	0	0	0	0	0	0	0	0.0150519	0	0	0
Ghir_A08G007220	0	0	0	0.0394995	0	0	0	0	0	0.0213637	0
Ghir_A08G006290	6.87773	4.28524	3.56634	11.3417	186.244	77.9421	60.2964	67.339	74.2042	79.7868	40.9651
