# Supplementary material for: Identification and Characterization of Phytocyanin Family Genes in Cotton Genomes
Source: Genes (Basel). 2023 Feb 28;14(3):611. doi: 10.3390/genes14030611 (PMC10048054; doi:10.3390/genes14030611)
Supplement: Supplementary file 1 [file genes-14-00611-s001.zip › supplementary table S5.xlsx]

## Sheet: Sheet1
Supplementary Table S A list of primers used in RT qPCR experiments.
Primer name	Primer sequence（5'-3'）
Gh_A03G1381-Forward	GCAAGAAAGGGCAAAAGCTC
Gh_A03G1381-Reverse	TGAGGGAGAAGGTGAAGGAG
Gh_A08G0530-Forward	GCAATACACCGTAGGAGACAG
Gh_A08G0530-Reverse	CGTAGTCGCTCTTGGATACTTC
Gh_D06G0284-Forward	CATTGTGAGAACGGCATGAAG
Gh_D06G0284-Reverse	AGATGGTGAAGTGGTTGATGG
Gh_D08G0624-Forward	GCAATACACCGTAGGAGACAG
Gh_D08G0624-Reverse	CGTAGTCGCTCTTGGATACTTC
