# Supplementary figures and images for: Identification and Characterization of Phytocyanin Family Genes in Cotton Genomes
Source: MDPI journal article supplement (doi:10.3390/genes14030611), 2023-02-28

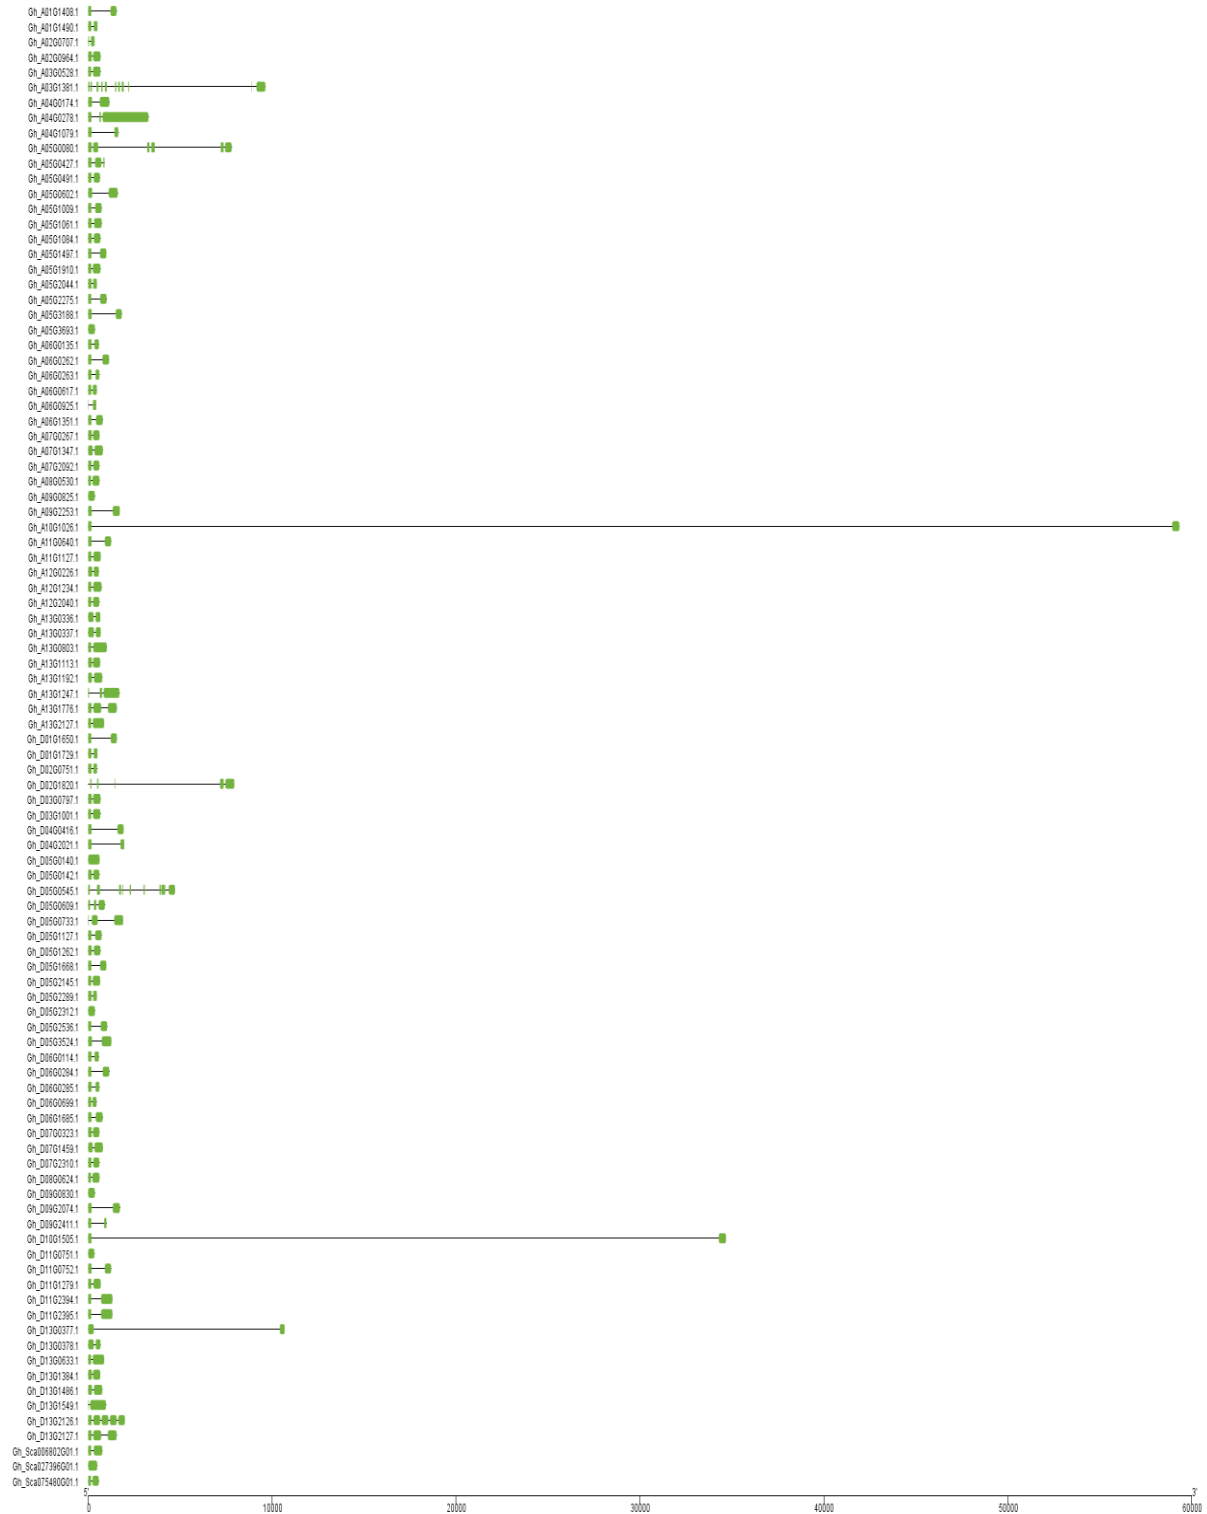

Figure S1: The gene structures of PCs. Gene structure analysis was performed by TBtools software.

Supplement: s1 [file s1]

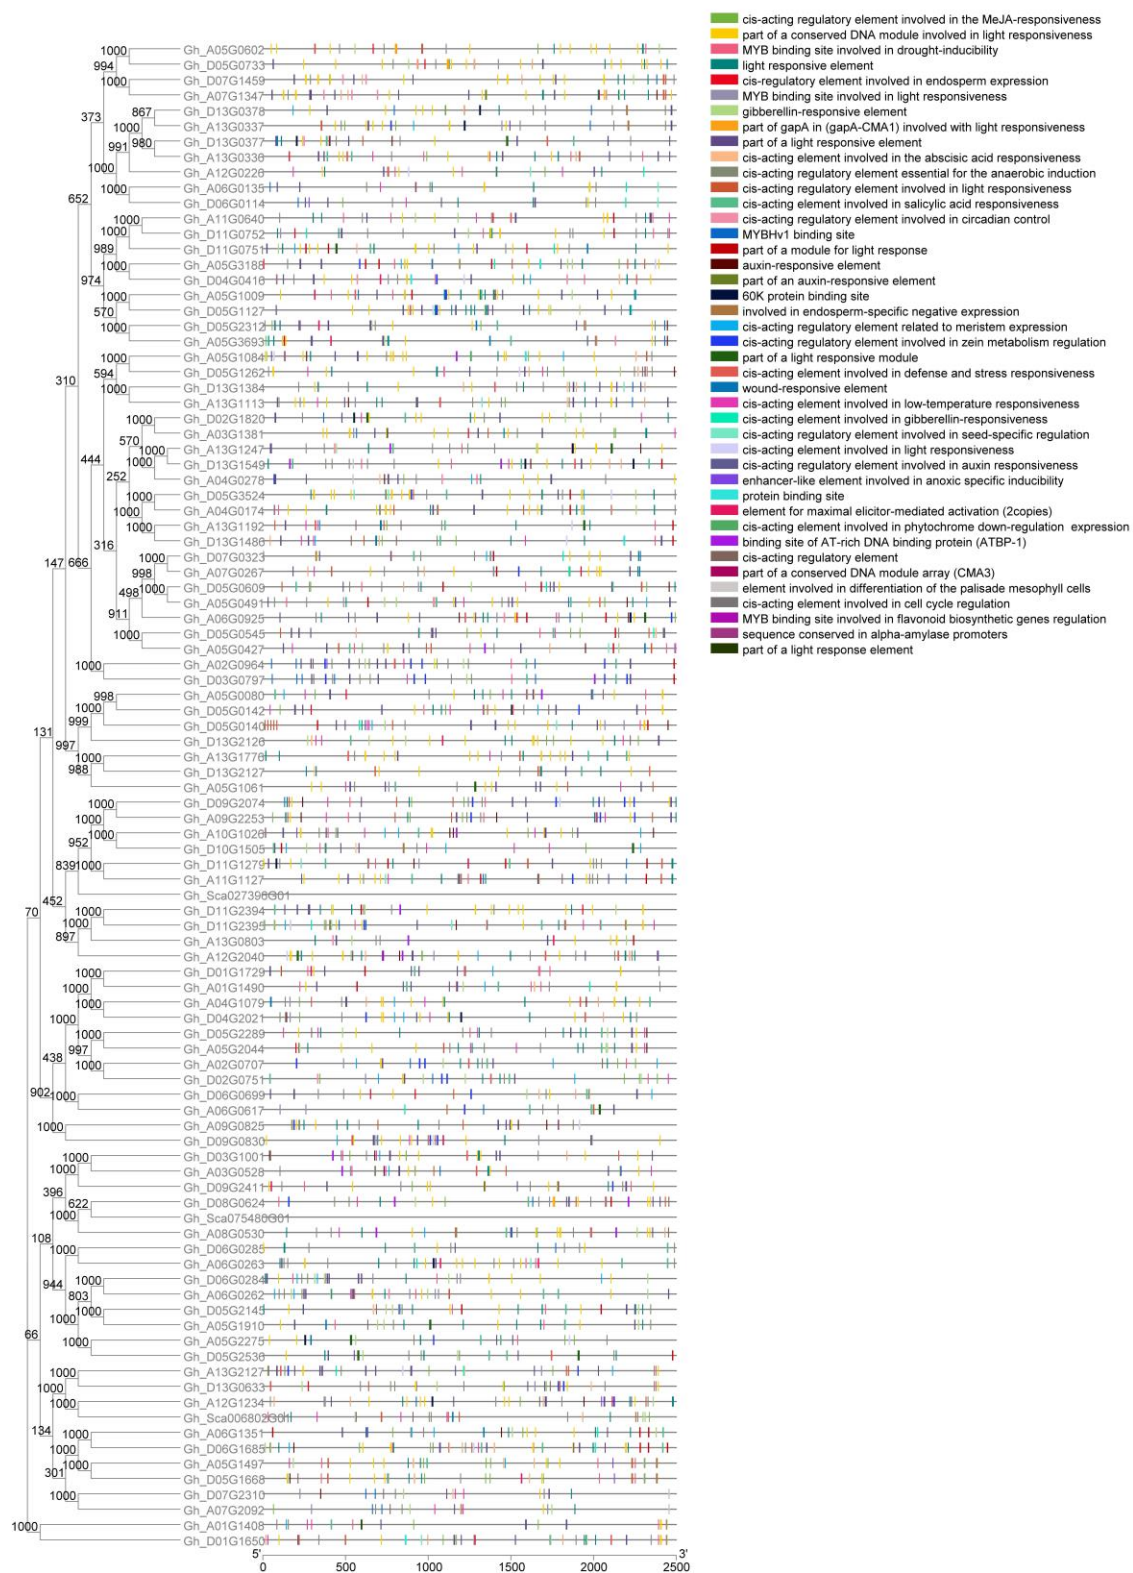

Supplement: s1 [file s1]
